# Supplementary material for: Protein assemblies in the Arabidopsis thaliana chloroplast compartment
Source: Front Plant Sci. 2024 Aug 16;15:1380969. doi: 10.3389/fpls.2024.1380969 (PMC11362043; doi:10.3389/fpls.2024.1380969)
Supplement: Supplementary file 2 [file Table1.xlsx]

## Sheet: Tabelle1
Supporting Table 1. Abundance of identified photosystem subunits used for stoichiometric calculations. AGI, Arabidopsis gene identifier; description, names of the identified proteins; iBAQ, intensity based absolute quantification (value). PSII subunits are given in blue, PSI subunits in red. Abundance of photosystems was calculated by cumulating iBAQ values of each identified subunit before the s…
AGI	description	iBAQ
AT5G66570.1	PsbO-1	67565645
AT3G50820.1	PsbO-2	1.01631e+07
ATCG00710.1	PsbH	133784300
ATCG00560.1	PsbL	51434852
ATCG00580.E	PsbE	131914100
ATCG00280.1	PsbC	112933636
ATCG00680.1	PsbB	135075205
ATCG00270.1	PsbD	128371760
ATCG00020.1	PsbA	99921387
ATCG00300.E	PsbZ	192909
AT4G21280.1	PsbQ-1	1.50589e+07
AT4G05180.1	PsbQ-2	5.36548e+06
AT3G21055.1	PsbTn	390879
AT1G08380.1	PsaO	42167.2
AT1G30380.1	PsaK	1.35687e+07
AT1G31330.1	PsaF	7.18941e+07
AT4G12800.1	PsaL	4.63659e+07
AT3G16140.1	PsaH-1	22809581
ATCG00340.1	PsaB	90997453
AT4G02770.1	PsaD-1	7.51038e+07
ATCG00350.1	PsaA	5.94839e+07
AT1G55670.1	PsaG	4.87901e+07
ATCG01060.1	PsaC	4.76276e+07
AT4G28750.1	PsaE-1	85305235
AT2G20260.1	PsaE-2	1.51947e+07
AT1G03130.1	PsaD-2	582472
ATCG00630.1	PsaJ	2.4932e+06
