# Supplementary material for: Protein assemblies in the Arabidopsis thaliana chloroplast compartment
Source: Front Plant Sci. 2024 Aug 16;15:1380969. doi: 10.3389/fpls.2024.1380969 (PMC11362043; doi:10.3389/fpls.2024.1380969)
Supplement: Supplementary file 3 [file Table2.xlsx]

## Sheet: Tabelle1
Supporting Table 2: Overview of DSBU cross-linked, SDS-solubilized samples
name of dataset	number of fractions	MS system	MS settings	MaxQuant version
1mM_DSBU_1%SDS_RawFiles	47	TIMsTOF	1.1cycle time 2-col	2.0.1.0
1stDSBU2ndSDS_CommonPrep_RawFiles	48	Q-Exactive	default	2.0.2.0
MP_Single_DSBURawFiles	48	Q-Exactive	default	2.0.2.0
