# Supplementary material for: Protein assemblies in the Arabidopsis thaliana chloroplast compartment
Source: Front Plant Sci. 2024 Aug 16;15:1380969. doi: 10.3389/fpls.2024.1380969 (PMC11362043; doi:10.3389/fpls.2024.1380969)
Supplement: Supplementary file 4 [file Table3.xlsx]

## Sheet: Overview
Supporting Table 3: All inter-links within the LL, GL, EL, and HL samples identified by MS, peptide resolution across all fractions
Fraction	Protein 1	Protein 2	Amino Acid 1	Amino Acid 2	LL	GL	EL	HL
48	ATCG00120.1	ATCG00130.E	T467	K94	0	0	1	0
48	ATCG00130.E	ATCG00120.1	K94	K506	0	0	2	1
48	ATCG00130.E	ATCG00480.1	T168	K86	0	0	1	0
48	ATCG00270.1	ATCG00680.1	T9	K227	0	1	1	0
47	AT2G20890.1	AT5G42270.1	K249	S433	0	1	0	0
47	AT2G30950.1	AT2G20890.1	K646	K194	0	1	0	0
47	AT2G46820.2	AT4G01150.1	K162	K159	0	1	1	0
47	AT4G32260.1	ATCG00120.1	T131	K506	0	0	1	0
47	ATCG00120.1	ATCG00130.E	K469	K94	0	0	1	0
47	ATCG00120.1	ATCG00130.E	K94	T168	0	0	1	0
47	ATCG00120.1	ATCG00480.1	T92	K86	0	0	2	0
47	ATCG00130.E	ATCG00120.1	K94	K506	2	0	2	2
47	ATCG00130.E	ATCG00480.1	K180	K86	0	0	1	0
47	ATCG00130.E	ATCG00480.1	T178	K86	1	0	0	0
47	ATCG00140.1	AT5G17670.1	K48	A2	1	0	1	1
47	ATCG00270.1	ATCG00680.1	K7	K227	0	1	0	1
47	ATCG00270.1	ATCG00680.1	K7	K504	0	1	0	0
47	ATCG00270.1	ATCG00680.1	T9	K227	0	1	1	1
47	ATCG00270.1	ATCG00680.1	T9	K504	0	0	0	1
47	ATCG00280.1	AT3G50820.1	S330	K244	1	0	0	0
47	ATCG00560.1	ATCG00680.1	T2	K130	0	0	1	0
47	ATCG00560.1	ATCG00680.1	T2	T128	0	1	0	0
47	ATCG00680.1	ATCG00270.1	K227	K10	0	0	1	0
47	ATCG00680.1	ATCG00580.E	K504	S2	1	0	0	0
47	ATCG00680.1	ATCG00710.1	K130	A2	0	1	0	0
47	ATCG00680.1	ATCG00710.1	T128	A2	0	0	1	0
47	ATCG00710.1	ATCG00680.1	A2	K227	0	1	0	0
46	AT2G20890.1	AT5G42270.1	S248	K430	0	0	1	0
46	AT4G04640.1	ATCG00470.1	Y182	K105	0	0	0	1
46	AT4G09650.1	ATCG00480.1	Y202	K86	0	0	1	0
46	AT4G32260.1	ATCG00120.1	T131	K506	0	1	0	0
46	AT5G01530.1	ATCG00710.1	K120	S16	1	0	0	0
46	AT5G01530.1	ATCG00710.1	T114	K21	1	0	0	0
46	AT5G42270.1	AT2G20890.1	Y658	K76	0	1	0	0
46	ATCG00120.1	AT4G04640.1	K506	K269	0	1	0	0
46	ATCG00120.1	ATCG00130.E	K469	K94	0	0	1	0
46	ATCG00120.1	ATCG00130.E	K94	T168	0	1	0	0
46	ATCG00120.1	ATCG00130.E	K94	T178	0	0	1	0
46	ATCG00120.1	ATCG00130.E	T467	K94	1	1	0	0
46	ATCG00120.1	ATCG00480.1	K94	K86	1	0	1	1
46	ATCG00120.1	ATCG00480.1	T92	K86	1	1	1	0
46	ATCG00130.E	ATCG00120.1	K180	T92	1	0	0	0
46	ATCG00130.E	ATCG00120.1	K94	K456	0	0	0	1
46	ATCG00130.E	ATCG00120.1	K94	K506	2	2	1	2
46	ATCG00130.E	ATCG00480.1	K180	K86	1	0	0	0
46	ATCG00130.E	ATCG00480.1	T168	K86	0	0	1	0
46	ATCG00140.1	AT5G17670.1	K48	A2	0	1	1	1
46	ATCG00270.1	ATCG00680.1	K10	K227	1	0	0	0
46	ATCG00270.1	ATCG00680.1	K7	K227	0	1	0	1
46	ATCG00270.1	ATCG00680.1	T9	K227	1	0	1	1
46	ATCG00280.1	AT3G50820.1	K339	K244	0	0	0	1
46	ATCG00280.1	AT3G50820.1	T335	K244	1	0	0	0
46	ATCG00560.1	ATCG00680.1	T2	K130	0	0	1	0
46	ATCG00560.1	ATCG00680.1	T2	T128	1	0	0	0
46	ATCG00560.1	ATCG00710.1	T2	A2	1	0	0	0
46	ATCG00680.1	AT5G66570.1	K304	S151	1	0	0	0
46	ATCG00680.1	ATCG00270.1	T128	K7	1	0	0	0
46	ATCG00680.1	ATCG00580.E	K504	S2	0	0	0	1
46	ATCG00680.1	ATCG00710.1	K130	A2	0	0	1	0
46	ATCG00680.1	ATCG00710.1	T128	A2	0	1	0	0
46	ATCG00710.1	ATCG00680.1	A2	T128	1	0	0	0
46	ATMG01190.E	ATCG00120.1	K384	K382	0	0	0	1
45	AT1G50250.1	AT3G55280.3	K517	K15	0	0	1	0
45	AT1G79040.1	ATCG00580.E	K51	T5	0	1	0	0
45	AT2G20890.1	AT5G42270.1	K249	S433	0	0	1	0
45	AT2G20890.1	AT5G42270.1	S248	K430	0	0	1	0
45	AT4G32260.1	ATCG00120.1	K159	K506	0	0	1	0
45	AT4G32260.1	ATCG00120.1	T131	K506	0	1	1	0
45	AT5G01530.1	ATCG00680.1	Y89	K227	0	1	0	0
45	AT5G01530.1	ATCG00710.1	T114	K21	1	0	0	0
45	ATCG00120.1	ATCG00130.E	K469	K94	0	1	1	0
45	ATCG00120.1	ATCG00130.E	K94	T168	0	1	0	0
45	ATCG00120.1	ATCG00130.E	T92	K180	1	0	0	0
45	ATCG00120.1	ATCG00480.1	K94	K86	1	0	0	0
45	ATCG00120.1	ATCG00480.1	T92	K86	0	0	1	1
45	ATCG00130.E	ATCG00120.1	K180	T92	0	0	1	1
45	ATCG00130.E	ATCG00120.1	K94	K456	0	1	0	0
45	ATCG00130.E	ATCG00120.1	K94	K506	2	1	1	2
45	ATCG00130.E	ATCG00480.1	T168	K86	1	0	0	0
45	ATCG00140.1	AT5G17670.1	K48	A2	0	0	1	1
45	ATCG00140.1	AT5G57655.2	K48	K80	1	0	0	0
45	ATCG00140.1	ATCG00470.1	K48	K109	0	0	2	0
45	ATCG00270.1	ATCG00680.1	K10	K227	0	0	1	0
45	ATCG00270.1	ATCG00680.1	K7	K227	0	1	1	1
45	ATCG00270.1	ATCG00680.1	T9	K227	2	1	1	1
45	ATCG00270.1	ATCG00680.1	T9	K504	0	1	1	0
45	ATCG00280.1	AT3G50820.1	K339	K244	0	1	1	0
45	ATCG00280.1	AT3G50820.1	Y340	K244	1	0	0	0
45	ATCG00480.1	AT4G04640.1	Y398	K343	0	1	0	0
45	ATCG00560.1	ATCG00680.1	T2	T128	0	1	1	0
45	ATCG00680.1	ATCG00580.E	K504	S2	1	0	0	1
45	ATCG00680.1	ATCG00710.1	K130	A2	0	1	1	0
45	ATCG00710.1	ATCG00680.1	A2	K227	0	1	0	0
45	ATMG01190.E	ATCG00120.1	K384	K382	0	0	0	1
44	AT3G48730.1	AT4G38970.1	S26	M1	0	1	0	0
44	ATCG00120.1	ATCG00130.E	K469	K94	0	1	0	0
44	ATCG00120.1	ATCG00130.E	K94	T168	0	0	1	0
44	ATCG00120.1	ATCG00130.E	T467	K94	0	0	1	0
44	ATCG00120.1	ATCG00130.E	T92	K180	0	1	0	0
44	ATCG00120.1	ATCG00480.1	K94	K86	0	0	1	0
44	ATCG00120.1	ATCG00480.1	T92	K86	0	0	1	0
44	ATCG00130.E	ATCG00120.1	K94	K456	0	1	0	0
44	ATCG00130.E	ATCG00120.1	K94	K506	0	2	2	1
44	ATCG00130.E	ATCG00480.1	K180	K86	0	1	1	0
44	ATCG00140.1	AT5G17670.1	K48	S8	0	1	0	0
44	ATCG00140.1	ATCG00470.1	K48	K109	0	0	1	0
44	ATCG00270.1	ATCG00680.1	K10	K227	0	1	0	0
44	ATCG00270.1	ATCG00680.1	K7	K227	0	1	0	0
44	ATCG00270.1	ATCG00680.1	T9	K227	0	1	1	1
44	ATCG00560.1	ATCG00710.1	T2	T5	0	1	0	0
44	ATCG00680.1	ATCG00270.1	K130	T9	0	1	0	0
44	ATCG00680.1	ATCG00580.E	K504	S2	1	1	0	0
44	ATCG00680.1	ATCG00710.1	K130	A2	0	1	0	0
43	AT2G20890.1	AT5G42270.1	K249	S433	0	0	0	1
43	AT4G10340.1	AT5G57490.1	K43	S95	1	0	0	0
43	AT5G01530.1	ATCG00710.1	K120	S16	0	0	1	0
43	AT5G01530.1	ATCG00710.1	T114	K21	0	1	0	0
43	ATCG00120.1	AT3G15090.1	K456	S6	1	0	0	0
43	ATCG00120.1	ATCG00130.E	K94	T168	0	1	0	0
43	ATCG00120.1	ATCG00130.E	T467	K94	0	1	1	0
43	ATCG00120.1	ATCG00130.E	T92	K180	0	0	1	0
43	ATCG00120.1	ATCG00480.1	T92	K86	1	0	2	0
43	ATCG00130.E	ATCG00120.1	K94	K456	1	1	0	0
43	ATCG00130.E	ATCG00120.1	K94	K506	2	2	1	0
43	ATCG00130.E	ATCG00480.1	K180	K86	0	1	1	0
43	ATCG00130.E	ATCG00480.1	T168	K86	1	0	0	0
43	ATCG00140.1	AT5G17670.1	K48	A2	0	1	1	1
43	ATCG00140.1	ATCG00470.1	K48	K109	0	0	1	0
43	ATCG00270.1	ATCG00680.1	K10	K227	1	1	0	0
43	ATCG00270.1	ATCG00680.1	K7	K227	1	1	0	0
43	ATCG00270.1	ATCG00680.1	K7	K504	0	1	0	0
43	ATCG00270.1	ATCG00680.1	T9	K227	1	0	1	2
43	ATCG00280.1	AT3G50820.1	Y340	K244	1	0	0	0
43	ATCG00560.1	ATCG00680.1	T2	T128	1	1	1	0
43	ATCG00680.1	ATCG00270.1	T128	K7	0	1	0	0
43	ATCG00680.1	ATCG00710.1	K130	A2	1	1	0	0
42	AT2G20890.1	AT5G42270.1	S248	K430	0	0	1	0
42	AT3G08940.2	ATCG00710.1	K117	S16	1	0	0	0
42	AT4G32260.1	ATCG00120.1	T131	K506	0	0	1	0
42	AT5G01530.1	ATCG00680.1	K103	K227	1	0	0	0
42	AT5G01530.1	ATCG00710.1	K120	S16	1	0	0	0
42	AT5G01530.1	ATCG00710.1	T114	K21	1	0	1	0
42	AT5G42270.1	AT2G20890.1	Y658	K76	0	0	1	0
42	AT5G58260.1	ATCG00430.1	K94	K163	0	0	1	0
42	ATCG00120.1	AT4G04640.1	K506	K269	1	0	0	0
42	ATCG00120.1	ATCG00130.E	K469	K94	0	1	0	0
42	ATCG00120.1	ATCG00130.E	K94	T168	0	1	0	0
42	ATCG00120.1	ATCG00130.E	K94	T178	0	0	1	0
42	ATCG00120.1	ATCG00130.E	T467	K94	0	0	1	1
42	ATCG00120.1	ATCG00480.1	K94	K86	1	0	0	1
42	ATCG00130.E	ATCG00120.1	K94	K456	0	1	1	0
42	ATCG00130.E	ATCG00120.1	K94	K506	2	1	1	2
42	ATCG00130.E	ATCG00480.1	T178	K86	0	0	1	0
42	ATCG00140.1	AT5G17670.1	K48	A2	1	2	2	0
42	ATCG00140.1	ATCG00470.1	K48	K109	0	0	1	0
42	ATCG00270.1	ATCG00680.1	K10	K227	1	1	1	0
42	ATCG00270.1	ATCG00680.1	T9	K227	2	1	1	2
42	ATCG00270.1	ATCG00680.1	T9	K504	1	1	1	0
42	ATCG00280.1	AT3G50820.1	K339	K244	0	0	1	0
42	ATCG00280.1	AT3G50820.1	Y340	K244	1	1	0	1
42	ATCG00480.1	AT4G04640.1	Y398	K343	0	0	1	0
42	ATCG00560.1	ATCG00680.1	T2	K130	0	0	1	0
42	ATCG00560.1	ATCG00680.1	T2	T128	1	1	0	0
42	ATCG00560.1	ATCG00710.1	S4	A2	1	0	0	0
42	ATCG00680.1	AT1G29930.1	T503	K37	1	0	0	0
42	ATCG00680.1	ATCG00270.1	K227	K10	1	0	0	0
42	ATCG00680.1	ATCG00580.E	K504	S2	1	0	0	0
42	ATCG00680.1	ATCG00710.1	K130	A2	0	1	1	0
42	ATCG00680.1	ATCG00710.1	T128	A2	1	0	0	0
42	ATMG01190.E	ATCG00120.1	K384	K382	0	0	0	1
41	AT1G43170.9	ATCG00120.1	K175	K506	0	0	0	1
41	AT2G20890.1	AT5G42270.1	K249	S433	0	0	0	1
41	AT4G09650.1	ATCG00480.1	Y202	K86	0	1	0	0
41	AT4G32260.1	ATCG00120.1	K159	K506	0	1	0	0
41	AT4G32260.1	ATCG00120.1	T131	K506	0	0	1	0
41	AT5G01530.1	ATCG00680.1	K103	K227	0	1	0	0
41	AT5G01530.1	ATCG00680.1	Y89	K227	0	0	1	0
41	AT5G01530.1	ATCG00710.1	T114	K21	0	1	0	0
41	AT5G23060.1	AT3G14110.2	S371	W2	1	0	0	0
41	AT5G42270.1	AT2G20890.1	Y658	K76	0	1	0	0
41	ATCG00120.1	AT3G46780.1	K374	K487	1	0	0	0
41	ATCG00120.1	ATCG00130.E	K94	T168	0	1	0	0
41	ATCG00120.1	ATCG00130.E	K94	T178	1	0	0	0
41	ATCG00120.1	ATCG00130.E	T467	K94	0	0	1	0
41	ATCG00120.1	ATCG00130.E	T92	K180	0	0	1	0
41	ATCG00120.1	ATCG00480.1	K94	K86	1	0	1	0
41	ATCG00120.1	ATCG00480.1	T92	K86	0	0	1	2
41	ATCG00130.E	ATCG00120.1	K94	K456	0	1	0	1
41	ATCG00130.E	ATCG00120.1	K94	K506	2	1	2	1
41	ATCG00130.E	ATCG00480.1	K180	K86	0	0	1	0
41	ATCG00130.E	ATCG00480.1	T168	K86	1	0	0	0
41	ATCG00140.1	AT5G17670.1	K48	A2	1	0	0	1
41	ATCG00140.1	AT5G17670.1	K48	S3	0	0	1	0
41	ATCG00270.1	ATCG00680.1	K7	K227	1	1	1	0
41	ATCG00270.1	ATCG00680.1	K7	K504	0	1	0	0
41	ATCG00270.1	ATCG00680.1	T9	K227	0	1	1	1
41	ATCG00280.1	AT3G50820.1	T335	K244	0	0	1	0
41	ATCG00280.1	AT3G50820.1	Y340	K244	1	1	0	0
41	ATCG00560.1	ATCG00680.1	T2	K130	0	0	0	1
41	ATCG00560.1	ATCG00680.1	T2	T128	1	1	0	0
41	ATCG00560.1	ATCG00710.1	T2	A2	0	1	0	0
41	ATCG00680.1	ATCG00270.1	K227	K10	1	0	0	0
41	ATCG00680.1	ATCG00710.1	K130	A2	1	1	0	0
41	ATCG00710.1	ATCG00680.1	A2	K227	0	1	0	0
41	ATMG01190.E	ATCG00120.1	K384	K382	0	0	0	1
40	AT3G08580.2	ATCG00730.1	T317	K6	1	0	0	0
40	AT4G09650.1	ATCG00480.1	S205	K86	0	1	0	0
40	AT5G01530.1	ATCG00710.1	K120	S16	1	0	0	0
40	AT5G01530.1	ATCG00710.1	T114	K21	1	0	1	0
40	AT5G58260.1	ATCG00430.1	K94	K163	0	1	0	0
40	ATCG00120.1	ATCG00130.E	K469	K94	0	0	1	0
40	ATCG00120.1	ATCG00480.1	K94	K86	1	0	1	0
40	ATCG00120.1	ATCG00480.1	T92	K86	1	0	0	1
40	ATCG00130.E	ATCG00120.1	K94	K506	2	1	2	1
40	ATCG00130.E	ATCG00480.1	T168	K86	0	0	1	0
40	ATCG00140.1	AT5G17670.1	K48	A2	1	1	1	0
40	ATCG00270.1	ATCG00680.1	K7	K227	2	1	0	1
40	ATCG00270.1	ATCG00680.1	K7	T503	1	0	0	0
40	ATCG00270.1	ATCG00680.1	T9	K227	0	1	1	1
40	ATCG00270.1	ATCG00680.1	T9	K504	0	1	1	0
40	ATCG00280.1	AT3G50820.1	K339	K244	1	0	0	0
40	ATCG00280.1	AT3G50820.1	Y340	K244	0	1	0	0
40	ATCG00560.1	ATCG00680.1	T2	T128	1	1	1	0
40	ATCG00560.1	ATCG00710.1	T2	A2	1	0	0	0
40	ATCG00680.1	ATCG00270.1	K504	K10	1	0	0	0
40	ATCG00680.1	ATCG00580.E	K504	S2	1	0	0	1
40	ATCG00680.1	ATCG00710.1	T128	A2	1	1	1	0
39	AT5G01530.1	ATCG00680.1	K103	K227	1	0	0	0
39	AT5G01530.1	ATCG00710.1	K120	T18	1	0	0	0
39	AT5G01530.1	ATCG00710.1	T114	K21	1	0	0	0
39	AT5G42270.1	AT2G20890.1	Y658	K76	0	0	1	0
39	ATCG00120.1	AT1G56190.2	K374	K68	1	0	0	0
39	ATCG00120.1	ATCG00130.E	K94	T168	1	0	1	0
39	ATCG00120.1	ATCG00480.1	T92	K86	1	0	0	0
39	ATCG00130.E	ATCG00120.1	K94	K456	0	1	0	0
39	ATCG00130.E	ATCG00120.1	K94	K506	2	1	2	1
39	ATCG00140.1	AT5G17670.1	K48	A2	0	0	0	1
39	ATCG00140.1	ATCG00470.1	K48	K109	0	0	0	1
39	ATCG00270.1	ATCG00680.1	K10	K227	1	1	0	0
39	ATCG00270.1	ATCG00680.1	K7	K227	1	2	0	0
39	ATCG00270.1	ATCG00680.1	T9	K227	1	0	1	2
39	ATCG00270.1	ATCG00680.1	T9	K504	0	1	0	0
39	ATCG00280.1	AT3G50820.1	K339	K244	0	1	0	0
39	ATCG00280.1	AT3G50820.1	T335	K244	0	0	1	0
39	ATCG00280.1	AT3G50820.1	Y340	K244	1	0	0	1
39	ATCG00560.1	ATCG00680.1	T2	K130	1	1	1	0
39	ATCG00560.1	ATCG00680.1	T2	T128	0	0	0	1
39	ATCG00560.1	ATCG00710.1	T2	A2	0	1	0	0
39	ATCG00680.1	AT5G66570.1	S299	K152	1	0	0	0
39	ATCG00680.1	ATCG00270.1	T128	K7	1	0	0	0
39	ATCG00680.1	ATCG00270.1	T503	K10	1	0	0	0
39	ATCG00680.1	ATCG00580.E	K504	S2	0	0	1	0
39	ATCG00680.1	ATCG00710.1	K130	A2	1	1	0	0
39	ATMG01190.E	ATCG00120.1	K384	K382	0	0	0	1
38	AT2G20890.1	AT5G42270.1	K249	S433	0	0	0	1
38	AT2G20890.1	AT5G42270.1	S248	K430	0	0	1	0
38	AT5G01530.1	ATCG00680.1	K103	K227	1	1	1	0
38	AT5G01530.1	ATCG00680.1	S96	K130	0	0	1	0
38	AT5G01530.1	ATCG00710.1	T114	K21	1	1	0	0
38	AT5G01530.1	ATCG00710.1	T114	K24	0	0	1	0
38	ATCG00120.1	AT4G04640.1	K506	T268	0	0	1	0
38	ATCG00120.1	ATCG00130.E	K94	T168	0	0	1	0
38	ATCG00120.1	ATCG00130.E	T467	K94	0	1	1	0
38	ATCG00120.1	ATCG00480.1	K94	K86	0	1	0	0
38	ATCG00120.1	ATCG00480.1	T92	K86	0	0	1	0
38	ATCG00130.E	ATCG00120.1	K94	K456	1	1	0	0
38	ATCG00130.E	ATCG00120.1	K94	K506	2	0	2	0
38	ATCG00130.E	ATCG00120.1	T178	K94	0	1	0	0
38	ATCG00130.E	ATCG00480.1	T168	K86	0	0	1	0
38	ATCG00130.E	ATCG00480.1	T178	K86	1	0	0	0
38	ATCG00140.1	AT5G17670.1	K48	A2	1	0	1	1
38	ATCG00270.1	ATCG00680.1	K7	K227	1	0	1	1
38	ATCG00270.1	ATCG00680.1	K7	K504	0	0	1	0
38	ATCG00270.1	ATCG00680.1	T9	K227	1	1	0	0
38	ATCG00270.1	ATCG00680.1	T9	K504	1	1	0	1
38	ATCG00280.1	AT3G50820.1	K339	K244	0	1	0	0
38	ATCG00280.1	AT3G50820.1	S330	K244	0	0	0	1
38	ATCG00280.1	AT3G50820.1	Y340	K244	1	0	0	0
38	ATCG00560.1	ATCG00680.1	T2	K130	1	0	0	1
38	ATCG00560.1	ATCG00680.1	T2	T128	0	1	1	0
38	ATCG00560.1	ATCG00710.1	T2	A2	0	1	0	0
38	ATCG00680.1	ATCG00710.1	T128	A2	0	1	1	1
37	AT1G43170.9	ATCG00120.1	K172	K506	0	0	1	0
37	AT2G20890.1	AT5G42270.1	K249	S433	0	0	1	0
37	AT5G01530.1	ATCG00680.1	K103	K227	0	1	1	0
37	AT5G01530.1	ATCG00680.1	K103	T128	0	0	1	0
37	AT5G01530.1	ATCG00710.1	T114	K21	0	0	0	1
37	ATCG00120.1	ATCG00130.E	K94	T168	0	0	1	0
37	ATCG00120.1	ATCG00130.E	T92	K180	0	1	0	0
37	ATCG00120.1	ATCG00480.1	K94	K86	0	0	1	0
37	ATCG00120.1	ATCG00480.1	T92	K86	1	1	0	0
37	ATCG00130.E	ATCG00120.1	K94	K456	0	0	1	0
37	ATCG00130.E	ATCG00120.1	K94	K506	2	1	2	1
37	ATCG00130.E	ATCG00480.1	T168	K86	0	0	1	0
37	ATCG00140.1	AT5G17670.1	K48	A2	0	1	1	1
37	ATCG00270.1	ATCG00680.1	K7	K227	1	0	0	1
37	ATCG00270.1	ATCG00680.1	T9	K227	1	1	1	1
37	ATCG00270.1	ATCG00680.1	T9	K504	0	1	0	1
37	ATCG00280.1	AT3G50820.1	K339	K244	0	0	0	1
37	ATCG00280.1	AT3G50820.1	Y340	K244	1	0	1	0
37	ATCG00560.1	ATCG00680.1	T2	K130	0	0	0	1
37	ATCG00560.1	ATCG00680.1	T2	T128	0	1	1	0
37	ATCG00560.1	ATCG00710.1	T2	A2	0	1	0	0
37	ATCG00680.1	AT5G66570.1	K304	S149	0	1	0	0
37	ATCG00680.1	ATCG00270.1	K130	T9	0	0	0	1
37	ATCG00680.1	ATCG00270.1	S132	K7	0	0	0	1
37	ATCG00680.1	ATCG00710.1	K130	A2	0	1	0	0
37	ATCG00710.1	ATCG00680.1	A2	K227	0	1	0	0
37	ATMG01190.E	ATCG00120.1	K384	K382	0	0	0	1
36	AT1G43170.9	ATCG00120.1	K172	K506	0	0	0	1
36	AT1G79040.1	ATCG00580.E	K51	S2	0	1	0	0
36	AT2G20890.1	AT5G42270.1	K249	S433	0	0	1	0
36	AT2G30950.1	AT2G20890.1	K646	K194	0	0	0	1
36	AT3G08940.2	AT1G29930.1	K231	K37	0	0	1	0
36	AT3G08940.2	ATCG00710.1	K117	S16	1	0	0	0
36	AT4G24280.1	ATCG00580.E	S394	S2	1	1	0	0
36	AT5G01530.1	ATCG00680.1	K103	K227	0	1	1	0
36	AT5G01530.1	ATCG00710.1	T114	K21	1	1	0	0
36	ATCG00120.1	AT2G18020.1	K491	T175	1	0	0	0
36	ATCG00120.1	AT3G46780.1	K374	K487	1	0	0	0
36	ATCG00120.1	ATCG00130.E	K94	T168	0	1	0	0
36	ATCG00130.E	ATCG00120.1	K94	K456	0	1	0	0
36	ATCG00130.E	ATCG00120.1	K94	K506	2	1	1	1
36	ATCG00130.E	ATCG00480.1	T168	K86	1	0	0	0
36	ATCG00140.1	AT4G04640.1	K48	K125	0	1	0	0
36	ATCG00140.1	AT5G17670.1	K48	A2	1	0	1	1
36	ATCG00140.1	ATCG00470.1	K48	K109	0	2	0	0
36	ATCG00270.1	ATCG00680.1	K10	K227	1	1	0	1
36	ATCG00270.1	ATCG00680.1	K7	K227	2	1	0	1
36	ATCG00270.1	ATCG00680.1	T9	K227	0	0	1	1
36	ATCG00270.1	ATCG00680.1	T9	K504	1	1	1	1
36	ATCG00280.1	AT3G50820.1	K339	K244	0	0	1	0
36	ATCG00280.1	AT3G50820.1	S330	K244	0	1	0	0
36	ATCG00280.1	AT3G50820.1	Y340	K244	0	0	0	1
36	ATCG00560.1	ATCG00680.1	T2	K130	0	1	1	0
36	ATCG00560.1	ATCG00680.1	T2	T128	1	0	0	1
36	ATCG00560.1	ATCG00710.1	T2	A2	0	1	0	0
36	ATCG00680.1	AT1G29930.1	T503	K37	0	0	0	1
36	ATCG00680.1	ATCG00270.1	K130	T9	0	1	0	0
36	ATCG00680.1	ATCG00270.1	T128	K7	0	0	1	1
36	ATCG00680.1	ATCG00580.E	K504	S2	1	0	1	0
36	ATCG00680.1	ATCG00710.1	K130	A2	1	1	0	1
36	ATCG00680.1	ATCG00710.1	T128	A2	0	0	1	0
36	ATMG01190.E	ATCG00120.1	K384	K382	0	0	0	1
35	AT2G20890.1	AT5G42270.1	K249	S433	0	0	1	0
35	AT3G08940.2	ATCG00710.1	T111	K21	0	1	0	0
35	AT4G04640.1	ATCG00470.1	Y182	K105	0	0	0	1
35	AT5G01530.1	ATCG00680.1	K103	K227	1	0	0	0
35	AT5G01530.1	ATCG00680.1	K103	T128	1	0	0	0
35	AT5G01530.1	ATCG00710.1	K120	S16	0	0	1	0
35	AT5G01530.1	ATCG00710.1	T114	K21	1	1	1	0
35	ATCG00120.1	AT4G04640.1	K506	T268	0	0	1	0
35	ATCG00120.1	ATCG00130.E	K469	K94	0	1	0	0
35	ATCG00120.1	ATCG00130.E	T467	K94	0	0	1	0
35	ATCG00120.1	ATCG00130.E	T92	K180	0	1	1	0
35	ATCG00120.1	ATCG00480.1	K94	T82	0	1	0	0
35	ATCG00120.1	ATCG00480.1	T92	K86	0	0	1	0
35	ATCG00130.E	ATCG00120.1	K94	K456	0	1	1	0
35	ATCG00130.E	ATCG00120.1	K94	K506	2	1	1	1
35	ATCG00130.E	ATCG00480.1	T178	K86	0	1	0	0
35	ATCG00140.1	AT5G17670.1	K48	A2	1	1	2	0
35	ATCG00140.1	ATCG00470.1	K48	K109	1	0	1	0
35	ATCG00270.1	ATCG00680.1	K10	K227	0	0	0	1
35	ATCG00270.1	ATCG00680.1	K7	K227	0	0	0	2
35	ATCG00270.1	ATCG00680.1	K7	K504	0	1	0	0
35	ATCG00270.1	ATCG00680.1	T9	K227	2	1	0	0
35	ATCG00270.1	ATCG00680.1	T9	K504	0	0	1	1
35	ATCG00280.1	AT3G50820.1	K339	K244	0	1	1	0
35	ATCG00280.1	AT3G50820.1	Y340	K244	1	0	0	1
35	ATCG00480.1	AT5G10980.1	K50	T119	0	0	0	1
35	ATCG00560.1	ATCG00680.1	T2	K130	0	0	1	1
35	ATCG00560.1	ATCG00680.1	T2	T128	0	1	0	0
35	ATCG00560.1	ATCG00710.1	S4	A2	0	0	1	0
35	ATCG00560.1	ATCG00710.1	T2	A2	1	1	0	0
35	ATCG00680.1	AT3G26710.1	K438	T35	1	0	0	0
35	ATCG00680.1	AT3G26710.1	T436	K36	0	0	0	1
35	ATCG00680.1	AT5G66570.1	K304	S149	0	1	0	0
35	ATCG00680.1	ATCG00270.1	K130	T9	0	1	0	0
35	ATCG00680.1	ATCG00270.1	T128	K7	0	0	0	1
35	ATCG00680.1	ATCG00580.E	K504	T5	1	0	0	0
35	ATCG00680.1	ATCG00710.1	K130	A2	2	0	1	1
35	ATCG00710.1	ATCG00680.1	A2	T128	0	1	0	0
35	ATMG01190.E	ATCG00120.1	K384	K382	0	0	0	1
34	AT2G20890.1	AT5G42270.1	K249	S433	0	0	1	0
34	AT3G08940.2	ATCG00710.1	T111	K21	1	0	0	0
34	AT4G04640.1	ATCG00470.1	Y182	K105	0	0	0	1
34	AT4G04640.1	ATCG00470.1	Y182	K109	1	0	0	0
34	AT5G01530.1	ATCG00680.1	K103	K227	1	1	0	0
34	AT5G01530.1	ATCG00680.1	K103	T128	0	1	0	0
34	AT5G01530.1	ATCG00710.1	K120	S16	1	0	0	0
34	AT5G01530.1	ATCG00710.1	T114	K21	1	1	1	0
34	AT5G35530.1	ATCG00120.1	K8	K506	1	0	0	0
34	AT5G58260.1	ATCG00430.1	K94	K163	0	0	1	0
34	ATCG00120.1	AT4G04640.1	K405	K269	0	0	1	0
34	ATCG00120.1	AT4G04640.1	K405	T268	0	1	0	0
34	ATCG00120.1	ATCG00130.E	K469	K94	0	1	0	0
34	ATCG00120.1	ATCG00130.E	K94	T168	0	1	0	0
34	ATCG00120.1	ATCG00130.E	K94	T178	1	0	0	0
34	ATCG00120.1	ATCG00480.1	K94	K86	0	1	0	0
34	ATCG00130.E	ATCG00120.1	K94	K456	0	2	0	0
34	ATCG00130.E	ATCG00120.1	K94	K506	2	1	2	1
34	ATCG00130.E	ATCG00480.1	T183	K86	1	0	0	0
34	ATCG00140.1	AT5G17670.1	K48	A2	1	0	0	0
34	ATCG00270.1	ATCG00680.1	K10	K227	0	0	0	1
34	ATCG00270.1	ATCG00680.1	K7	K227	2	2	0	1
34	ATCG00270.1	ATCG00680.1	K7	K504	0	1	0	0
34	ATCG00270.1	ATCG00680.1	T9	K227	0	0	0	1
34	ATCG00270.1	ATCG00680.1	T9	K504	1	0	1	1
34	ATCG00280.1	AT3G50820.1	T335	K244	1	0	0	0
34	ATCG00280.1	AT3G50820.1	Y340	K244	0	0	1	1
34	ATCG00560.1	ATCG00680.1	T2	K130	1	1	1	0
34	ATCG00560.1	ATCG00680.1	T2	T128	0	0	0	1
34	ATCG00560.1	ATCG00710.1	T2	A2	1	1	0	0
34	ATCG00680.1	AT1G29930.1	T503	K37	1	0	0	0
34	ATCG00680.1	AT3G26710.1	K438	T35	0	0	0	1
34	ATCG00680.1	AT5G65020.2	K438	K266	1	0	0	0
34	ATCG00680.1	ATCG00270.1	K130	T9	0	1	0	0
34	ATCG00680.1	ATCG00270.1	K227	K10	0	1	0	0
34	ATCG00680.1	ATCG00270.1	T128	K7	0	0	0	1
34	ATCG00680.1	ATCG00580.E	K504	S2	0	0	1	0
34	ATCG00680.1	ATCG00710.1	K130	A2	0	1	1	0
34	ATCG00710.1	AT1G29930.1	A2	K41	0	1	0	0
34	ATCG00710.1	ATCG00680.1	A2	T128	1	0	0	0
34	ATMG01190.E	ATCG00120.1	K384	K382	0	0	0	1
33	AT1G43170.9	ATCG00120.1	K175	K506	1	0	0	0
33	AT3G08940.2	ATCG00710.1	K117	T18	1	0	0	0
33	AT3G56650.1	ATCG00120.1	S16	K456	0	0	1	0
33	AT4G04640.1	ATCG00470.1	Y182	K109	1	0	0	0
33	AT4G09650.1	ATCG00480.1	S205	K86	1	0	0	0
33	AT4G09650.1	ATCG00480.1	Y202	K86	0	1	0	1
33	AT4G32260.1	ATCG00120.1	S132	K506	0	1	0	0
33	AT5G01530.1	ATCG00680.1	K103	K227	0	1	0	0
33	AT5G01530.1	ATCG00710.1	T114	K21	0	1	0	0
33	AT5G04140.1	AT3G20820.1	K239	S105	1	0	0	0
33	AT5G58260.1	ATCG00430.1	K94	K163	0	1	0	1
33	ATCG00120.1	ATCG00130.E	K469	K94	0	0	0	1
33	ATCG00120.1	ATCG00130.E	T467	K94	0	1	0	0
33	ATCG00120.1	ATCG00480.1	T92	K86	2	0	0	0
33	ATCG00130.E	ATCG00120.1	K94	K456	0	1	0	0
33	ATCG00130.E	ATCG00120.1	K94	K506	2	2	0	2
33	ATCG00140.1	AT5G17670.1	K48	A2	1	1	0	1
33	ATCG00270.1	ATCG00680.1	K10	K227	1	0	0	0
33	ATCG00270.1	ATCG00680.1	K7	K227	1	1	1	1
33	ATCG00270.1	ATCG00680.1	K7	K504	0	1	0	0
33	ATCG00270.1	ATCG00680.1	T9	K227	1	1	1	1
33	ATCG00270.1	ATCG00680.1	T9	K504	0	0	1	1
33	ATCG00280.1	AT3G50820.1	K339	K244	0	1	0	0
33	ATCG00280.1	AT3G50820.1	T335	K244	0	0	1	0
33	ATCG00280.1	AT3G50820.1	Y340	K244	1	0	0	1
33	ATCG00560.1	ATCG00680.1	T2	K130	0	1	0	1
33	ATCG00560.1	ATCG00680.1	T2	T128	1	0	1	0
33	ATCG00560.1	ATCG00710.1	T2	A2	1	1	0	0
33	ATCG00680.1	AT3G26710.1	K438	T35	0	0	1	0
33	ATCG00680.1	ATCG00270.1	K130	T9	1	0	0	1
33	ATCG00680.1	ATCG00270.1	K227	K10	0	1	0	0
33	ATCG00680.1	ATCG00270.1	T128	K7	0	1	0	0
33	ATCG00680.1	ATCG00580.E	K504	S2	1	0	1	0
33	ATCG00680.1	ATCG00710.1	K130	A2	1	1	0	1
33	ATCG00680.1	ATCG00710.1	T128	A2	0	0	1	0
33	ATMG01190.E	ATCG00120.1	K384	K382	0	0	0	1
32	AT4G09650.1	ATCG00480.1	K208	K86	1	0	0	0
32	AT4G09650.1	ATCG00480.1	Y202	K86	0	1	0	0
32	AT5G01530.1	ATCG00680.1	K103	K227	0	0	0	1
32	AT5G01530.1	ATCG00680.1	K103	T128	0	1	1	0
32	AT5G01530.1	ATCG00680.1	Y89	K130	0	0	0	1
32	AT5G01530.1	ATCG00710.1	T114	K21	1	0	2	0
32	AT5G50920.1	AT4G04640.1	S164	K80	0	1	0	0
32	ATCG00120.1	AT4G04640.1	K506	K269	1	0	0	0
32	ATCG00120.1	ATCG00130.E	K94	T178	0	1	0	0
32	ATCG00120.1	ATCG00130.E	T467	K94	1	1	1	0
32	ATCG00120.1	ATCG00480.1	T92	K86	1	1	0	0
32	ATCG00130.E	ATCG00120.1	K94	K456	1	0	1	0
32	ATCG00130.E	ATCG00120.1	K94	K506	2	0	2	1
32	ATCG00140.1	AT5G17670.1	K48	A2	1	1	1	0
32	ATCG00140.1	ATCG00470.1	K48	K109	0	1	0	0
32	ATCG00270.1	ATCG00680.1	K7	K227	1	1	1	0
32	ATCG00270.1	ATCG00680.1	K7	K504	0	1	1	0
32	ATCG00270.1	ATCG00680.1	T9	K227	0	0	0	1
32	ATCG00270.1	ATCG00680.1	T9	K504	1	0	0	1
32	ATCG00280.1	AT3G50820.1	T335	K244	0	0	0	1
32	ATCG00280.1	AT3G50820.1	Y340	K244	1	1	1	0
32	ATCG00560.1	ATCG00680.1	T2	K130	0	0	0	1
32	ATCG00560.1	ATCG00680.1	T2	T128	1	1	1	0
32	ATCG00560.1	ATCG00710.1	T2	A2	1	1	0	0
32	ATCG00680.1	AT1G29930.1	T503	K37	0	0	0	1
32	ATCG00680.1	AT5G02160.1	T503	K95	0	0	1	0
32	ATCG00680.1	AT5G65020.2	K438	Y269	1	0	0	0
32	ATCG00680.1	ATCG00270.1	K130	K7	0	1	0	1
32	ATCG00680.1	ATCG00270.1	K130	T9	0	0	0	1
32	ATCG00680.1	ATCG00580.E	K504	S2	0	1	1	0
32	ATCG00680.1	ATCG00710.1	K130	A2	1	0	1	1
32	ATCG00680.1	ATCG00710.1	T128	A2	0	1	0	0
32	ATCG00710.1	ATCG00680.1	A2	K130	0	1	0	0
32	ATCG00710.1	ATCG00680.1	A2	T502	0	0	1	0
32	ATMG01190.E	ATCG00120.1	K384	K382	0	0	0	1
31	AT1G43170.9	ATCG00120.1	K175	K506	1	0	0	0
31	AT1G79040.1	ATCG00580.E	K51	S2	0	1	0	0
31	AT4G09650.1	ATCG00480.1	Y202	K86	0	1	0	0
31	AT4G32260.1	ATCG00120.1	K162	K456	0	0	0	1
31	AT4G32260.1	ATCG00120.1	T131	K506	0	0	1	0
31	AT5G01530.1	ATCG00680.1	K103	K227	1	0	1	0
31	AT5G01530.1	ATCG00680.1	K103	T128	0	1	0	0
31	AT5G01530.1	ATCG00680.1	T114	K130	0	0	1	0
31	AT5G01530.1	ATCG00710.1	K120	S16	0	0	0	1
31	AT5G01530.1	ATCG00710.1	T114	K21	1	1	1	0
31	AT5G50920.1	AT4G04640.1	S164	K80	0	1	0	0
31	ATCG00120.1	AT3G46780.1	K374	K487	1	0	0	0
31	ATCG00120.1	ATCG00130.E	K466	K94	0	0	0	1
31	ATCG00120.1	ATCG00130.E	K94	T168	1	0	0	0
31	ATCG00120.1	ATCG00130.E	K94	T178	0	0	1	0
31	ATCG00120.1	ATCG00130.E	T467	K94	0	0	0	1
31	ATCG00120.1	ATCG00130.E	T92	K180	0	1	0	0
31	ATCG00120.1	ATCG00480.1	T92	K86	1	0	1	0
31	ATCG00130.E	ATCG00120.1	K94	K456	1	0	1	0
31	ATCG00130.E	ATCG00120.1	K94	K506	2	2	2	0
31	ATCG00130.E	ATCG00480.1	T168	K86	0	0	1	0
31	ATCG00140.1	AT4G04640.1	K48	K125	0	0	1	0
31	ATCG00140.1	AT5G17670.1	K48	A2	1	0	1	0
31	ATCG00140.1	ATCG00470.1	K48	K109	0	0	1	1
31	ATCG00270.1	ATCG00680.1	K7	K227	1	1	0	2
31	ATCG00270.1	ATCG00680.1	K7	K504	0	1	1	1
31	ATCG00270.1	ATCG00680.1	T9	K227	1	0	2	0
31	ATCG00270.1	ATCG00680.1	T9	K504	1	0	0	0
31	ATCG00280.1	AT3G50820.1	S330	K244	1	1	0	0
31	ATCG00280.1	AT3G50820.1	Y340	K244	0	0	1	1
31	ATCG00480.1	AT4G04640.1	Y398	K343	1	0	0	0
31	ATCG00560.1	ATCG00680.1	T2	K130	1	1	1	1
31	ATCG00560.1	ATCG00710.1	T2	A2	1	1	0	0
31	ATCG00680.1	AT1G29930.1	K504	K37	0	0	1	1
31	ATCG00680.1	AT3G26710.1	K438	T35	0	1	0	0
31	ATCG00680.1	ATCG00270.1	K130	T9	0	1	0	0
31	ATCG00680.1	ATCG00270.1	K504	K10	0	0	1	0
31	ATCG00680.1	ATCG00270.1	T128	K7	0	0	0	1
31	ATCG00680.1	ATCG00580.E	K504	S2	1	2	1	0
31	ATCG00680.1	ATCG00710.1	K130	A2	0	0	1	0
31	ATCG00680.1	ATCG00710.1	T128	A2	1	0	0	0
31	ATCG00710.1	AT1G29930.1	A2	K41	0	1	0	0
31	ATCG00710.1	ATCG00680.1	A2	K130	0	0	0	1
31	ATCG00710.1	ATCG00680.1	A2	K227	0	0	1	0
31	ATMG01190.E	ATCG00120.1	K384	K382	0	0	0	1
30	AT1G79040.1	ATCG00580.E	K48	S2	0	1	0	0
30	AT2G07698.1	AT3G54210.1	K654	K104	1	0	0	0
30	AT3G08940.2	AT1G29930.1	K231	K37	0	1	1	0
30	AT4G04640.1	ATCG00470.1	Y182	K105	0	0	1	1
30	AT4G09650.1	ATCG00480.1	Y202	K86	0	1	0	0
30	AT4G15000.2	ATCG01110.1	K22	S109	0	1	0	0
30	AT4G32260.1	AT5G56030.1	K129	K246	0	1	0	0
30	AT4G32260.1	ATCG00120.1	S132	K506	0	0	0	1
30	AT4G32260.1	ATCG00120.1	T131	K506	0	1	1	0
30	AT5G01530.1	ATCG00680.1	K103	K227	0	1	0	0
30	AT5G01530.1	ATCG00710.1	K120	S16	0	0	1	0
30	AT5G01530.1	ATCG00710.1	T114	K21	0	0	1	0
30	ATCG00120.1	ATCG00130.E	K469	K94	1	0	0	1
30	ATCG00120.1	ATCG00130.E	K94	T168	0	1	0	0
30	ATCG00120.1	ATCG00130.E	K94	T178	1	0	0	0
30	ATCG00120.1	ATCG00480.1	T92	K86	0	1	0	0
30	ATCG00130.E	ATCG00120.1	K94	K456	0	1	0	0
30	ATCG00130.E	ATCG00120.1	K94	K506	2	1	2	1
30	ATCG00130.E	ATCG00480.1	T178	K86	1	0	0	0
30	ATCG00140.1	AT4G04640.1	K48	K125	0	0	1	0
30	ATCG00140.1	AT5G17670.1	K48	A2	1	1	0	1
30	ATCG00140.1	ATCG00470.1	K48	K109	0	0	1	0
30	ATCG00270.1	ATCG00680.1	K10	K227	1	0	0	0
30	ATCG00270.1	ATCG00680.1	K7	K227	2	1	1	1
30	ATCG00270.1	ATCG00680.1	K7	K504	0	1	0	0
30	ATCG00270.1	ATCG00680.1	K7	T503	0	0	0	1
30	ATCG00270.1	ATCG00680.1	T9	K227	0	1	0	1
30	ATCG00270.1	ATCG00680.1	T9	K504	0	0	1	0
30	ATCG00280.1	AT3G50820.1	K339	K244	1	1	0	0
30	ATCG00280.1	AT3G50820.1	Y340	K244	0	0	1	1
30	ATCG00560.1	ATCG00680.1	T2	K130	0	1	1	1
30	ATCG00560.1	ATCG00680.1	T2	T128	1	0	0	0
30	ATCG00560.1	ATCG00710.1	T2	A2	0	1	0	0
30	ATCG00680.1	AT1G29930.1	T503	K37	0	1	0	1
30	ATCG00680.1	AT5G66570.1	K304	K152	1	0	0	0
30	ATCG00680.1	AT5G66570.1	K304	S149	0	1	0	0
30	ATCG00680.1	ATCG00270.1	K130	T9	0	0	0	2
30	ATCG00680.1	ATCG00270.1	T128	K7	0	1	1	0
30	ATCG00680.1	ATCG00270.1	T503	K10	0	1	0	0
30	ATCG00680.1	ATCG00580.E	K504	S2	1	0	0	1
30	ATCG00680.1	ATCG00710.1	K130	A2	0	1	1	1
30	ATCG00680.1	ATCG00710.1	T128	A2	1	0	0	0
30	ATMG01190.E	ATCG00120.1	K384	K382	0	0	0	1
29	AT1G02910.1	ATCG00120.1	K262	K456	0	1	0	0
29	AT1G43170.9	ATCG00120.1	K172	K506	1	0	0	0
29	AT3G08940.2	ATCG00710.1	K117	S16	1	0	0	0
29	AT4G04640.1	ATCG00470.1	Y182	K109	1	1	0	1
29	AT4G09650.1	ATCG00480.1	Y202	K86	1	0	1	0
29	AT4G24280.1	ATCG00730.1	T32	K6	0	1	0	0
29	AT4G32260.1	ATCG00120.1	S132	K506	0	1	0	0
29	AT5G01530.1	ATCG00680.1	K103	K227	1	1	0	0
29	AT5G01530.1	ATCG00680.1	K103	T128	0	1	1	1
29	AT5G01530.1	ATCG00710.1	K120	S16	1	0	1	0
29	AT5G01530.1	ATCG00710.1	T114	K21	1	0	0	0
29	AT5G07090.2	ATCG00710.1	T214	A2	0	0	1	0
29	AT5G66570.1	ATCG00280.1	K216	T335	0	1	0	0
29	ATCG00120.1	ATCG00130.E	T467	K94	1	0	0	0
29	ATCG00130.E	ATCG00120.1	K180	T92	1	0	0	0
29	ATCG00130.E	ATCG00120.1	K94	K456	1	1	1	0
29	ATCG00130.E	ATCG00120.1	K94	K506	2	1	0	0
29	ATCG00130.E	ATCG00480.1	T178	K86	1	0	0	0
29	ATCG00140.1	AT5G17670.1	K48	A2	0	0	0	1
29	ATCG00140.1	AT5G57655.2	K48	K80	1	0	0	0
29	ATCG00140.1	ATCG00470.1	K48	K109	1	0	0	0
29	ATCG00270.1	AT5G02160.1	T9	K95	0	0	0	1
29	ATCG00270.1	ATCG00680.1	K10	K227	0	2	0	1
29	ATCG00270.1	ATCG00680.1	K13	K227	0	0	1	0
29	ATCG00270.1	ATCG00680.1	K7	K227	2	1	1	2
29	ATCG00270.1	ATCG00680.1	K7	K504	0	1	0	0
29	ATCG00270.1	ATCG00680.1	K7	T503	0	0	1	0
29	ATCG00270.1	ATCG00680.1	T9	K504	1	0	0	1
29	ATCG00280.1	AT3G50820.1	K339	K244	0	1	1	1
29	ATCG00280.1	AT3G50820.1	T335	K244	1	0	0	0
29	ATCG00560.1	ATCG00680.1	T2	K130	1	1	1	1
29	ATCG00560.1	ATCG00710.1	T2	A2	1	1	0	0
29	ATCG00680.1	AT1G29930.1	K504	K37	0	0	1	1
29	ATCG00680.1	AT5G02160.1	K504	K95	1	0	0	0
29	ATCG00680.1	AT5G66570.1	K304	S149	1	0	0	0
29	ATCG00680.1	ATCG00270.1	K130	K7	0	0	1	0
29	ATCG00680.1	ATCG00270.1	K130	T9	0	0	1	1
29	ATCG00680.1	ATCG00270.1	T128	K7	1	0	0	1
29	ATCG00680.1	ATCG00580.E	K504	S2	1	0	1	1
29	ATCG00680.1	ATCG00710.1	K130	A2	1	1	1	1
29	ATCG00710.1	ATCG00680.1	A2	K227	0	1	1	1
29	ATCG00710.1	ATCG00680.1	A2	K504	0	1	0	0
28	AT1G79040.1	ATCG00680.1	K48	T502	0	0	1	0
28	AT2G07698.1	AT3G54210.1	K654	K104	1	0	0	0
28	AT3G08940.2	ATCG00710.1	T111	K21	1	0	0	0
28	AT4G04640.1	ATCG00470.1	Y182	K105	0	0	0	1
28	AT4G04640.1	ATCG00470.1	Y182	K109	1	0	0	0
28	AT4G09650.1	ATCG00480.1	Y202	K86	1	1	0	0
28	AT5G01530.1	ATCG00680.1	K103	K227	1	1	0	1
28	AT5G01530.1	ATCG00680.1	K103	T128	0	0	0	1
28	AT5G01530.1	ATCG00680.1	T114	K130	1	0	0	0
28	AT5G01530.1	ATCG00680.1	Y89	K130	1	0	0	0
28	AT5G01530.1	ATCG00710.1	K120	S16	1	0	0	0
28	ATCG00120.1	AT4G04640.1	K506	K269	1	0	0	0
28	ATCG00120.1	ATCG00480.1	T92	K86	0	1	0	0
28	ATCG00130.E	ATCG00120.1	K94	K456	0	1	1	1
28	ATCG00130.E	ATCG00120.1	K94	K506	2	2	1	1
28	ATCG00140.1	AT5G17670.1	K48	A2	1	1	1	0
28	ATCG00140.1	ATCG00470.1	K48	K109	1	0	0	0
28	ATCG00270.1	AT5G02160.1	T9	K95	0	0	1	0
28	ATCG00270.1	ATCG00680.1	K10	K227	1	0	0	0
28	ATCG00270.1	ATCG00680.1	K7	K227	2	1	1	0
28	ATCG00270.1	ATCG00680.1	T9	K227	0	1	1	2
28	ATCG00270.1	ATCG00680.1	T9	K504	1	1	1	1
28	ATCG00280.1	AT3G50820.1	K339	K244	1	1	0	0
28	ATCG00280.1	AT3G50820.1	T335	K244	0	0	0	1
28	ATCG00280.1	AT3G50820.1	Y340	K244	0	0	1	0
28	ATCG00350.1	AT1G30380.1	K327	K79	0	0	0	1
28	ATCG00560.1	ATCG00680.1	T2	G2	1	0	1	0
28	ATCG00560.1	ATCG00680.1	T2	K130	1	1	1	1
28	ATCG00560.1	ATCG00710.1	T2	A2	1	0	0	0
28	ATCG00680.1	AT1G29930.1	K504	K37	0	0	0	1
28	ATCG00680.1	AT1G29930.1	T503	K37	1	0	0	0
28	ATCG00680.1	AT3G26710.1	K438	T35	0	0	1	0
28	ATCG00680.1	AT3G50820.1	K438	K244	0	0	1	0
28	ATCG00680.1	AT5G66570.1	S289	K152	0	1	0	0
28	ATCG00680.1	ATCG00270.1	K130	K7	0	1	1	0
28	ATCG00680.1	ATCG00270.1	K130	T9	0	1	0	1
28	ATCG00680.1	ATCG00270.1	K227	K10	0	1	0	0
28	ATCG00680.1	ATCG00270.1	T128	K7	1	0	0	0
28	ATCG00680.1	ATCG00580.E	K504	S2	1	0	1	0
28	ATCG00680.1	ATCG00710.1	K130	A2	1	0	1	1
28	ATCG00680.1	ATCG00710.1	K130	S10	1	0	0	0
28	ATCG00710.1	AT1G29930.1	A2	K37	0	0	1	0
28	ATCG00710.1	ATCG00270.1	S10	K7	1	0	0	0
28	ATCG00710.1	ATCG00680.1	A2	K130	0	1	0	0
28	ATCG00710.1	ATCG00680.1	A2	K227	1	1	0	0
27	AT1G79040.1	ATCG00580.E	K48	S2	0	1	0	0
27	AT1G79040.1	ATCG00580.E	K51	S2	0	1	0	1
27	AT3G08940.2	ATCG00710.1	T111	K21	1	0	0	0
27	AT3G50820.1	ATCG00680.1	K244	K438	1	0	0	0
27	AT4G09650.1	ATCG00480.1	S205	K86	0	0	1	0
27	AT4G09650.1	ATCG00480.1	S207	K86	1	0	0	0
27	AT4G32260.1	ATCG00120.1	K136	K506	0	0	0	1
27	AT5G01530.1	ATCG00680.1	K103	K227	0	1	0	0
27	AT5G01530.1	ATCG00710.1	K120	S16	0	0	0	1
27	AT5G01530.1	ATCG00710.1	T114	K21	1	0	1	0
27	ATCG00120.1	AT4G04640.1	K506	K269	1	0	0	0
27	ATCG00120.1	ATCG00130.E	K94	T168	1	0	0	0
27	ATCG00120.1	ATCG00480.1	T92	K86	1	0	0	0
27	ATCG00130.E	ATCG00120.1	K94	K456	1	1	1	0
27	ATCG00130.E	ATCG00120.1	K94	K506	2	2	2	1
27	ATCG00140.1	AT5G17670.1	K48	A2	1	0	0	2
27	ATCG00140.1	ATCG00470.1	K48	K109	0	0	1	0
27	ATCG00270.1	AT1G29930.1	T9	K37	0	0	0	1
27	ATCG00270.1	AT5G02160.1	T9	K95	0	1	0	1
27	ATCG00270.1	ATCG00680.1	K10	K227	1	1	0	0
27	ATCG00270.1	ATCG00680.1	K7	K227	1	1	2	2
27	ATCG00270.1	ATCG00680.1	K7	K504	0	1	1	0
27	ATCG00270.1	ATCG00680.1	T9	K227	0	1	0	0
27	ATCG00270.1	ATCG00680.1	T9	K504	1	0	0	1
27	ATCG00280.1	AT3G50820.1	Y340	K244	1	1	1	1
27	ATCG00560.1	ATCG00680.1	T2	K130	0	1	1	1
27	ATCG00560.1	ATCG00680.1	T2	T128	1	0	0	0
27	ATCG00560.1	ATCG00680.1	T2	Y6	0	0	1	0
27	ATCG00560.1	ATCG00710.1	T2	A2	1	0	1	0
27	ATCG00680.1	AT1G29930.1	K504	K37	0	0	0	1
27	ATCG00680.1	AT1G29930.1	T503	K37	0	1	0	0
27	ATCG00680.1	ATCG00270.1	K130	K7	0	1	0	1
27	ATCG00680.1	ATCG00270.1	K130	T9	0	0	0	1
27	ATCG00680.1	ATCG00270.1	T128	K7	1	0	1	0
27	ATCG00680.1	ATCG00270.1	T503	K10	0	1	0	0
27	ATCG00680.1	ATCG00580.E	K504	S2	2	1	0	0
27	ATCG00680.1	ATCG00710.1	K130	A2	1	1	1	1
27	ATCG00710.1	ATCG00680.1	A2	K227	1	0	1	0
27	ATCG00710.1	ATCG00680.1	A2	T503	0	1	0	0
27	ATMG01190.E	ATCG00120.1	K384	K382	0	0	0	1
26	AT1G43170.9	ATCG00120.1	K172	K506	1	0	0	0
26	AT2G05070.1	AT1G29930.1	K42	K41	0	0	0	1
26	AT3G50820.1	ATCG00680.1	K244	K438	1	0	0	1
26	AT4G04640.1	ATCG00470.1	Y182	K105	0	0	1	0
26	AT4G04640.1	ATCG00470.1	Y182	K109	0	1	0	0
26	AT4G10340.1	AT1G29930.1	K43	K41	0	0	1	0
26	AT5G01530.1	ATCG00680.1	K103	K227	0	1	0	0
26	AT5G01530.1	ATCG00680.1	K103	T128	0	1	0	0
26	AT5G01530.1	ATCG00710.1	T114	K21	2	1	1	1
26	AT5G66570.1	AT4G21280.1	K272	S30	1	0	0	0
26	AT5G66570.1	ATCG00280.1	K216	T335	0	0	1	0
26	ATCG00120.1	ATCG00130.E	T467	K94	0	0	0	1
26	ATCG00120.1	ATCG00130.E	T92	K180	0	0	1	0
26	ATCG00130.E	ATCG00120.1	K94	K456	0	1	1	0
26	ATCG00130.E	ATCG00120.1	K94	K506	2	1	2	1
26	ATCG00140.1	AT4G04640.1	K48	K125	0	0	1	0
26	ATCG00140.1	ATCG00470.1	K48	K109	0	0	1	0
26	ATCG00270.1	AT1G29930.1	K7	K41	0	1	0	0
26	ATCG00270.1	AT1G29930.1	T9	K41	0	0	1	0
26	ATCG00270.1	AT1G74970.1	K7	Y109	0	0	0	1
26	ATCG00270.1	ATCG00680.1	K10	K227	0	1	0	0
26	ATCG00270.1	ATCG00680.1	K13	K227	0	0	1	0
26	ATCG00270.1	ATCG00680.1	K7	K227	1	1	1	1
26	ATCG00270.1	ATCG00680.1	K7	K504	0	1	1	2
26	ATCG00270.1	ATCG00680.1	T9	K227	0	0	1	0
26	ATCG00270.1	ATCG00680.1	T9	K504	1	0	0	0
26	ATCG00280.1	AT3G50820.1	K339	K244	1	0	0	0
26	ATCG00280.1	AT3G50820.1	Y340	K244	0	1	1	1
26	ATCG00350.1	AT1G30380.1	K327	K79	1	0	0	0
26	ATCG00470.1	AT4G04640.1	K109	K125	1	0	0	0
26	ATCG00560.1	ATCG00680.1	T2	K130	1	1	1	1
26	ATCG00560.1	ATCG00710.1	T2	A2	1	1	0	0
26	ATCG00580.E	AT2G24820.1	S2	S288	0	1	0	0
26	ATCG00680.1	AT1G29930.1	K504	K37	0	0	0	1
26	ATCG00680.1	AT1G29930.1	K504	K41	0	0	0	1
26	ATCG00680.1	AT1G29930.1	T503	K37	0	0	1	0
26	ATCG00680.1	ATCG00270.1	K130	K7	1	0	0	0
26	ATCG00680.1	ATCG00270.1	K130	T9	0	1	0	1
26	ATCG00680.1	ATCG00270.1	T128	K7	0	0	1	1
26	ATCG00680.1	ATCG00710.1	K130	A2	1	1	0	1
26	ATCG00710.1	ATCG00270.1	T5	K7	1	0	0	0
26	ATCG00710.1	ATCG00680.1	A2	K227	1	1	0	0
26	ATCG01060.1	AT4G02770.1	K6	K203	0	0	1	0
26	ATCG01060.1	AT4G02770.1	S4	K203	1	0	0	0
26	ATMG01190.E	ATCG00120.1	K384	K382	0	0	0	1
25	AT1G06680.1	AT1G51400.1	K115	K88	0	1	0	0
25	AT1G79040.1	ATCG00580.E	K51	S2	0	0	0	1
25	AT3G08940.2	ATCG00710.1	K117	S16	1	0	1	0
25	AT3G50820.1	ATCG00680.1	K244	K438	0	1	0	0
25	AT4G04640.1	ATCG00470.1	Y182	K109	0	1	0	0
25	AT4G32260.1	ATCG00120.1	T131	K506	0	1	0	0
25	AT5G01530.1	ATCG00680.1	K103	K227	0	1	0	0
25	AT5G01530.1	ATCG00680.1	K103	T128	0	1	0	0
25	AT5G01530.1	ATCG00710.1	K120	S16	1	1	0	1
25	AT5G01530.1	ATCG00710.1	T114	K21	1	1	1	0
25	ATCG00120.1	AT3G46780.1	K374	K487	1	0	0	0
25	ATCG00120.1	ATCG00130.E	K469	K94	0	0	1	0
25	ATCG00120.1	ATCG00130.E	T92	K180	0	0	1	0
25	ATCG00120.1	ATCG00480.1	T92	K86	0	0	1	0
25	ATCG00130.E	ATCG00120.1	K94	K456	1	0	0	0
25	ATCG00130.E	ATCG00120.1	K94	K506	2	2	2	0
25	ATCG00130.E	ATCG00480.1	T168	K86	0	0	1	0
25	ATCG00140.1	AT4G04640.1	K48	K125	0	0	1	0
25	ATCG00140.1	ATCG00470.1	K48	K109	0	0	1	0
25	ATCG00270.1	AT1G29930.1	T9	K41	0	1	0	0
25	ATCG00270.1	ATCG00680.1	K10	K227	1	1	0	0
25	ATCG00270.1	ATCG00680.1	K7	K227	1	1	1	2
25	ATCG00270.1	ATCG00680.1	K7	K504	1	1	0	1
25	ATCG00270.1	ATCG00680.1	T9	K227	1	0	1	0
25	ATCG00270.1	ATCG00680.1	T9	K504	0	0	1	0
25	ATCG00280.1	AT3G50820.1	K339	K244	0	0	0	1
25	ATCG00280.1	AT3G50820.1	Y340	K244	1	1	1	0
25	ATCG00350.1	AT1G30380.1	K327	K79	0	0	0	1
25	ATCG00560.1	ATCG00680.1	T2	K130	1	1	1	1
25	ATCG00560.1	ATCG00710.1	S4	A2	0	1	0	0
25	ATCG00680.1	AT1G29930.1	T503	K37	0	1	0	0
25	ATCG00680.1	AT5G65020.2	K438	K266	1	0	0	0
25	ATCG00680.1	ATCG00270.1	K130	K7	0	0	0	1
25	ATCG00680.1	ATCG00270.1	K130	T9	1	0	1	1
25	ATCG00680.1	ATCG00580.E	K504	S2	1	0	0	0
25	ATCG00680.1	ATCG00710.1	K130	A2	1	1	1	1
25	ATCG00710.1	AT1G29930.1	A2	K37	0	1	0	0
25	ATCG00710.1	AT1G29930.1	A2	K41	0	1	0	0
25	ATCG00710.1	ATCG00680.1	A2	K227	0	1	0	0
25	ATCG01060.1	AT4G02770.1	S2	K203	0	0	1	0
25	ATCG01060.1	AT4G02770.1	S2	T201	2	0	0	0
24	AT1G43170.9	ATCG00120.1	K170	K506	0	0	0	1
24	AT3G50820.1	ATCG00680.1	K244	K438	0	0	1	0
24	AT5G01530.1	ATCG00710.1	T114	K21	0	2	0	0
24	ATCG00120.1	ATCG00480.1	T92	K86	1	0	1	0
24	ATCG00130.E	ATCG00120.1	K94	K506	2	2	2	0
24	ATCG00140.1	AT4G04640.1	K48	K125	0	0	1	0
24	ATCG00140.1	AT5G17670.1	K48	A2	1	0	1	0
24	ATCG00140.1	ATCG00470.1	K48	K109	0	0	1	0
24	ATCG00270.1	AT5G02160.1	K7	K95	0	0	0	1
24	ATCG00270.1	ATCG00680.1	K7	K227	0	1	1	0
24	ATCG00270.1	ATCG00680.1	K7	K504	1	0	0	1
24	ATCG00270.1	ATCG00680.1	T9	K227	2	1	1	0
24	ATCG00270.1	ATCG00680.1	T9	K504	0	1	1	0
24	ATCG00280.1	AT3G50820.1	Y340	K244	1	1	0	1
24	ATCG00350.1	AT1G30380.1	K327	K79	0	0	1	0
24	ATCG00470.1	AT4G04640.1	K109	K125	0	1	1	0
24	ATCG00560.1	AT5G07090.2	T2	T214	0	0	1	0
24	ATCG00560.1	ATCG00680.1	T2	K130	0	0	0	1
24	ATCG00560.1	ATCG00680.1	T2	T128	1	1	0	0
24	ATCG00560.1	ATCG00710.1	T2	A2	1	0	0	0
24	ATCG00580.E	AT2G24820.1	S2	S288	0	0	0	1
24	ATCG00680.1	AT5G65020.2	K438	K266	1	0	0	0
24	ATCG00680.1	AT5G66570.1	K304	K152	1	0	0	0
24	ATCG00680.1	ATCG00270.1	K130	K7	0	1	0	0
24	ATCG00680.1	ATCG00270.1	K130	T9	0	0	0	1
24	ATCG00680.1	ATCG00270.1	T128	K7	1	0	1	1
24	ATCG00680.1	ATCG00580.E	K504	S2	0	1	0	0
24	ATCG00680.1	ATCG00710.1	K130	A2	0	1	1	0
24	ATCG00680.1	ATCG00710.1	T128	A2	0	0	1	0
24	ATCG00710.1	ATCG00270.1	A2	T9	1	0	0	0
24	ATCG00710.1	ATCG00680.1	A2	K130	1	0	0	0
24	ATCG00710.1	ATCG00680.1	A2	K227	0	1	0	0
24	ATCG00710.1	ATCG00680.1	A2	T503	0	1	0	0
24	ATCG01060.1	AT4G02770.1	K6	T201	0	0	1	0
24	ATMG01190.E	ATCG00120.1	K384	K382	0	0	0	1
23	AT1G43170.9	ATCG00120.1	K170	K506	1	0	0	0
23	AT1G43170.9	ATCG00120.1	K172	K506	1	0	0	0
23	AT3G08940.2	ATCG00710.1	K117	S16	0	0	0	1
23	AT3G08940.2	ATCG00710.1	T111	K24	1	0	0	0
23	AT3G25920.1	AT3G50820.1	S120	K244	0	0	0	1
23	AT4G10340.1	AT1G29930.1	K42	K37	0	0	0	1
23	AT4G10340.1	AT1G29930.1	K43	K37	0	0	0	1
23	AT5G01530.1	ATCG00680.1	K103	K227	1	0	0	0
23	AT5G01530.1	ATCG00680.1	K103	T128	1	0	0	0
23	AT5G01530.1	ATCG00680.1	T114	K130	0	0	0	1
23	AT5G01530.1	ATCG00680.1	Y89	K130	0	0	1	0
23	AT5G01530.1	ATCG00710.1	T114	K21	1	0	1	1
23	ATCG00120.1	AT4G04640.1	K506	K269	0	0	1	0
23	ATCG00130.E	ATCG00120.1	K94	K456	0	0	1	0
23	ATCG00130.E	ATCG00120.1	K94	K506	1	1	0	0
23	ATCG00140.1	AT4G04640.1	K48	K125	0	0	1	0
23	ATCG00140.1	AT5G17670.1	K48	A2	1	0	0	0
23	ATCG00140.1	ATCG00470.1	K48	K109	0	0	1	0
23	ATCG00270.1	ATCG00680.1	K13	K227	0	0	0	1
23	ATCG00270.1	ATCG00680.1	K7	K227	0	1	1	2
23	ATCG00270.1	ATCG00680.1	K7	K504	1	1	1	1
23	ATCG00270.1	ATCG00680.1	T9	K227	2	1	0	0
23	ATCG00280.1	AT3G50820.1	K339	K244	1	0	0	0
23	ATCG00280.1	AT3G50820.1	T335	K244	0	0	0	1
23	ATCG00280.1	AT3G50820.1	Y340	K244	0	1	1	1
23	ATCG00560.1	ATCG00680.1	T2	K130	0	1	1	0
23	ATCG00560.1	ATCG00680.1	T2	T128	1	0	0	1
23	ATCG00560.1	ATCG00710.1	S4	A2	0	1	0	0
23	ATCG00560.1	ATCG00710.1	T2	A2	1	0	0	0
23	ATCG00580.E	AT2G24820.1	S2	S288	0	0	0	1
23	ATCG00680.1	AT1G29930.1	T503	K37	0	0	1	0
23	ATCG00680.1	AT5G66570.1	S297	K152	1	0	0	0
23	ATCG00680.1	ATCG00270.1	K130	K7	1	0	1	0
23	ATCG00680.1	ATCG00270.1	K130	T9	0	0	1	2
23	ATCG00680.1	ATCG00270.1	T503	K10	1	1	0	1
23	ATCG00680.1	ATCG00580.E	K504	S2	1	0	1	0
23	ATCG00680.1	ATCG00580.E	K504	S4	1	0	0	0
23	ATCG00680.1	ATCG00710.1	K130	A2	1	1	1	1
23	ATCG00710.1	ATCG00680.1	A2	K227	0	1	0	0
23	ATCG01060.1	AT4G02770.1	S2	K203	2	0	1	0
23	ATMG01190.E	ATCG00120.1	K384	K382	0	0	0	1
22	AT1G03130.1	AT2G20260.1	S184	K95	0	1	0	0
22	AT3G08940.2	ATCG00710.1	T111	K21	0	0	0	1
22	AT4G28660.1	ATCG00680.1	K159	K227	0	1	0	0
22	AT5G01530.1	ATCG00710.1	K120	S16	1	0	0	1
22	AT5G01530.1	ATCG00710.1	T114	K21	1	0	1	0
22	ATCG00120.1	AT4G04640.1	K506	K269	1	0	0	0
22	ATCG00120.1	ATCG00130.E	K469	K94	0	0	1	0
22	ATCG00120.1	ATCG00130.E	T92	K180	0	0	1	0
22	ATCG00120.1	ATCG00480.1	K94	K86	2	0	1	0
22	ATCG00120.1	ATCG00480.1	T92	K86	0	0	1	0
22	ATCG00130.E	ATCG00120.1	K94	K506	2	1	2	0
22	ATCG00140.1	AT5G17670.1	K48	A2	0	0	0	1
22	ATCG00270.1	AT5G02160.1	T9	K95	0	1	0	0
22	ATCG00270.1	ATCG00680.1	K13	K227	0	0	0	1
22	ATCG00270.1	ATCG00680.1	K7	K227	1	1	1	2
22	ATCG00270.1	ATCG00680.1	K7	K504	0	1	0	1
22	ATCG00270.1	ATCG00680.1	K7	T503	1	0	0	0
22	ATCG00270.1	ATCG00680.1	T9	K227	1	1	1	0
22	ATCG00270.1	ATCG00680.1	T9	K504	0	0	1	0
22	ATCG00280.1	AT3G50820.1	K339	K244	0	0	1	0
22	ATCG00280.1	AT3G50820.1	T335	K244	1	0	0	0
22	ATCG00280.1	AT3G50820.1	Y340	K244	0	1	0	1
22	ATCG00350.1	AT1G30380.1	K327	K79	0	0	1	0
22	ATCG00470.1	AT4G04640.1	K109	K125	0	0	0	1
22	ATCG00560.1	ATCG00680.1	T2	G2	0	0	1	0
22	ATCG00560.1	ATCG00680.1	T2	K130	1	1	1	1
22	ATCG00560.1	ATCG00710.1	T2	A2	1	0	0	0
22	ATCG00680.1	AT1G29930.1	K504	K37	0	0	0	1
22	ATCG00680.1	AT1G29930.1	T503	K37	0	0	1	0
22	ATCG00680.1	AT5G67500.1	K438	T196	0	0	0	1
22	ATCG00680.1	ATCG00270.1	K130	K7	1	0	0	1
22	ATCG00680.1	ATCG00270.1	K130	T9	0	0	1	1
22	ATCG00680.1	ATCG00270.1	K504	K10	0	0	1	0
22	ATCG00680.1	ATCG00270.1	T503	K10	0	1	0	0
22	ATCG00680.1	ATCG00580.E	T503	S2	1	0	0	0
22	ATCG00680.1	ATCG00710.1	K130	A2	1	1	1	1
22	ATCG00710.1	AT1G29930.1	A2	K41	0	1	0	0
22	ATCG00710.1	ATCG00270.1	S10	K7	1	0	0	0
22	ATCG00710.1	ATCG00680.1	A2	K227	1	1	0	0
22	ATCG00710.1	ATCG00680.1	A2	T503	0	1	0	0
22	ATCG01060.1	AT1G03130.1	S2	T197	0	1	0	0
22	ATCG01060.1	AT4G02770.1	S4	K203	1	0	0	0
22	ATMG01190.E	ATCG00120.1	K384	K382	0	0	0	1
21	AT1G06680.1	AT1G51400.1	S114	K88	0	1	0	0
21	AT3G08940.2	ATCG00710.1	T111	K21	1	0	0	0
21	AT3G50820.1	ATCG00680.1	K244	K438	1	0	0	0
21	AT4G02770.1	AT2G20260.1	S188	K95	1	0	0	0
21	AT4G04640.1	ATCG00470.1	Y182	K109	0	0	0	1
21	AT5G01530.1	ATCG00680.1	K103	K227	0	0	1	0
21	AT5G01530.1	ATCG00710.1	K120	S16	0	0	0	1
21	AT5G01530.1	ATCG00710.1	T114	K21	1	1	1	0
21	ATCG00120.1	ATCG00480.1	T92	K86	1	0	2	0
21	ATCG00130.E	ATCG00120.1	K94	K506	0	0	1	0
21	ATCG00140.1	AT5G17670.1	K48	A2	1	0	0	0
21	ATCG00140.1	AT5G57655.2	K48	K80	1	0	0	0
21	ATCG00270.1	AT1G29930.1	T9	K37	0	0	0	1
21	ATCG00270.1	AT4G38780.1	K7	T1224	1	0	0	0
21	ATCG00270.1	ATCG00170.1	K7	K1202	0	0	0	1
21	ATCG00270.1	ATCG00170.1	T9	K1202	0	0	0	1
21	ATCG00270.1	ATCG00680.1	K10	K227	1	0	0	0
21	ATCG00270.1	ATCG00680.1	K7	K227	1	2	2	1
21	ATCG00270.1	ATCG00680.1	K7	K504	0	1	1	1
21	ATCG00270.1	ATCG00680.1	K7	T503	1	0	0	0
21	ATCG00270.1	ATCG00680.1	T9	K227	1	0	0	1
21	ATCG00270.1	ATCG00680.1	T9	K504	0	0	1	0
21	ATCG00280.1	AT3G50820.1	K339	K244	0	1	1	0
21	ATCG00280.1	AT3G50820.1	Y340	K244	1	0	0	1
21	ATCG00560.1	ATCG00680.1	T2	K130	1	1	0	1
21	ATCG00560.1	ATCG00680.1	T2	T128	0	0	1	0
21	ATCG00560.1	ATCG00710.1	T2	A2	0	1	0	0
21	ATCG00580.E	AT2G24820.1	S2	S288	0	1	0	0
21	ATCG00680.1	AT1G29930.1	K504	K37	0	0	1	0
21	ATCG00680.1	AT1G29930.1	K504	K41	0	1	0	0
21	ATCG00680.1	AT5G65020.2	K438	K266	1	0	0	0
21	ATCG00680.1	ATCG00270.1	K130	K7	0	0	1	2
21	ATCG00680.1	ATCG00270.1	T128	K7	1	0	0	0
21	ATCG00680.1	ATCG00270.1	T503	K10	0	1	1	0
21	ATCG00680.1	ATCG00580.E	K504	S2	2	0	0	0
21	ATCG00680.1	ATCG00710.1	K130	A2	1	0	0	1
21	ATCG00710.1	ATCG00270.1	T5	K7	1	0	0	0
21	ATCG00710.1	ATCG00680.1	A2	K130	0	1	0	0
21	ATCG00710.1	ATCG00680.1	A2	K227	0	1	1	0
21	ATCG00710.1	ATCG00680.1	A2	T503	0	1	0	0
21	ATCG01060.1	AT1G03130.1	S2	K199	0	1	0	0
21	ATCG01060.1	AT4G02770.1	S2	T201	1	0	0	0
21	ATMG01190.E	ATCG00120.1	K384	K382	0	0	0	1
20	AT1G06680.1	AT1G51400.1	K115	K88	0	1	0	0
20	AT1G43170.9	ATCG00120.1	K172	K506	1	0	0	0
20	AT1G79040.1	ATCG00580.E	T49	S2	0	1	0	0
20	AT3G50820.1	ATCG00680.1	K244	K438	0	0	0	1
20	AT5G01530.1	ATCG00680.1	Y89	K227	0	1	0	0
20	AT5G01530.1	ATCG00710.1	T114	K21	1	1	0	0
20	ATCG00120.1	AT3G15090.1	K456	S6	1	0	0	0
20	ATCG00120.1	ATCG00480.1	K94	K86	1	0	0	0
20	ATCG00120.1	ATCG00480.1	T92	K86	1	1	0	0
20	ATCG00130.E	ATCG00120.1	K94	K506	1	1	0	1
20	ATCG00140.1	AT5G17670.1	K48	A2	1	1	0	1
20	ATCG00140.1	ATCG00470.1	K48	K109	0	0	1	0
20	ATCG00270.1	AT1G29930.1	T9	K37	0	0	0	1
20	ATCG00270.1	AT1G29930.1	T9	K41	0	0	0	1
20	ATCG00270.1	AT1G74970.1	K7	Y109	0	0	0	1
20	ATCG00270.1	ATCG00680.1	K7	K227	2	1	0	1
20	ATCG00270.1	ATCG00680.1	K7	K504	0	0	0	1
20	ATCG00270.1	ATCG00680.1	T9	K227	0	1	1	0
20	ATCG00270.1	ATCG00680.1	T9	K504	1	1	1	0
20	ATCG00280.1	AT3G50820.1	K339	K244	0	1	0	0
20	ATCG00280.1	AT3G50820.1	Y340	K244	1	0	1	1
20	ATCG00560.1	ATCG00680.1	T2	K130	0	1	1	1
20	ATCG00560.1	ATCG00680.1	T2	T128	1	0	0	0
20	ATCG00560.1	ATCG00710.1	T2	A2	0	1	1	0
20	ATCG00680.1	AT1G29930.1	T503	K37	0	0	1	0
20	ATCG00680.1	AT5G66570.1	S299	K152	0	1	0	0
20	ATCG00680.1	ATCG00270.1	K130	K7	0	2	1	0
20	ATCG00680.1	ATCG00270.1	K130	T9	0	0	0	1
20	ATCG00680.1	ATCG00270.1	K504	K10	0	0	0	1
20	ATCG00680.1	ATCG00270.1	T128	K7	1	0	1	1
20	ATCG00680.1	ATCG00270.1	T503	K10	0	1	1	0
20	ATCG00680.1	ATCG00580.E	K504	S2	1	0	0	0
20	ATCG00680.1	ATCG00710.1	K130	A2	1	0	1	1
20	ATCG00710.1	AT1G29930.1	T5	K41	0	1	0	0
20	ATCG00710.1	ATCG00270.1	A2	K7	0	1	0	0
20	ATCG00710.1	ATCG00270.1	A2	T9	0	1	0	0
20	ATCG00710.1	ATCG00270.1	S10	K7	0	0	1	0
20	ATCG00710.1	ATCG00680.1	A2	K227	0	1	1	0
20	ATCG00710.1	ATCG00680.1	A2	T128	0	1	0	0
20	ATCG00710.1	ATCG00680.1	A2	T502	0	1	0	0
20	ATMG01190.E	ATCG00120.1	K384	K382	0	0	0	1
19	AT4G04640.1	ATCG00470.1	Y182	K105	0	0	0	1
19	AT5G01530.1	AT1G29930.1	K234	K37	0	0	0	1
19	AT5G01530.1	ATCG00710.1	K120	K21	0	0	0	1
19	AT5G01530.1	ATCG00710.1	K120	S16	0	1	0	0
19	AT5G01530.1	ATCG00710.1	T114	K21	1	0	0	0
19	ATCG00120.1	ATCG00480.1	K491	K495	0	0	0	1
19	ATCG00120.1	ATCG00480.1	T92	K86	0	1	0	0
19	ATCG00140.1	AT5G17670.1	K48	A2	0	1	1	0
19	ATCG00270.1	AT1G29930.1	K7	K41	0	1	0	0
19	ATCG00270.1	ATCG00170.1	T9	K1202	0	0	1	0
19	ATCG00270.1	ATCG00680.1	K10	K227	1	0	0	0
19	ATCG00270.1	ATCG00680.1	K7	K227	1	1	2	2
19	ATCG00270.1	ATCG00680.1	K7	K504	1	1	1	1
19	ATCG00270.1	ATCG00680.1	T9	K227	1	0	0	0
19	ATCG00280.1	AT3G50820.1	K339	K244	1	0	0	0
19	ATCG00280.1	AT3G50820.1	Y340	K244	0	1	1	1
19	ATCG00350.1	AT1G30380.1	K327	K79	1	0	0	0
19	ATCG00470.1	AT4G04640.1	K109	K125	0	0	0	1
19	ATCG00560.1	ATCG00680.1	T2	K130	0	1	1	1
19	ATCG00560.1	ATCG00680.1	T2	T128	1	0	0	0
19	ATCG00560.1	ATCG00710.1	T2	A2	1	0	0	0
19	ATCG00680.1	AT1G29930.1	K504	K41	0	0	0	1
19	ATCG00680.1	AT4G37820.1	S289	K355	0	1	0	0
19	ATCG00680.1	ATCG00270.1	K130	K7	0	1	0	1
19	ATCG00680.1	ATCG00270.1	K130	T9	1	0	0	1
19	ATCG00680.1	ATCG00270.1	K504	K10	0	1	0	1
19	ATCG00680.1	ATCG00270.1	T503	K10	1	0	0	0
19	ATCG00680.1	ATCG00580.E	K504	S2	1	0	0	0
19	ATCG00680.1	ATCG00710.1	T128	A2	1	0	0	0
19	ATCG00710.1	ATCG00680.1	A2	K227	1	1	0	0
19	ATCG00710.1	ATCG00680.1	A2	K504	0	0	0	1
19	ATCG00710.1	ATCG00680.1	A2	T128	0	0	1	0
19	ATMG01190.E	ATCG00120.1	K384	K382	0	0	0	1
18	AT1G43170.9	ATCG00120.1	K175	K506	1	0	0	0
18	AT1G77510.1	AT3G27850.1	S493	K183	1	0	0	0
18	AT2G05070.1	AT1G29930.1	T40	K37	0	0	0	1
18	AT2G27530.2	ATCG00120.1	K24	K456	1	0	0	0
18	AT5G01530.1	ATCG00710.1	K120	S16	0	0	1	0
18	AT5G01530.1	ATCG00710.1	T114	K21	1	0	0	0
18	ATCG00120.1	ATCG00480.1	K94	K86	1	0	0	0
18	ATCG00120.1	ATCG00480.1	T92	K86	1	0	0	0
18	ATCG00270.1	AT1G29930.1	K7	K41	0	1	0	1
18	ATCG00270.1	AT1G29930.1	T9	K37	0	1	1	0
18	ATCG00270.1	AT1G74970.1	K7	Y109	1	0	0	0
18	ATCG00270.1	AT5G02160.1	K7	K95	0	1	0	0
18	ATCG00270.1	ATCG00680.1	K10	K227	1	1	0	0
18	ATCG00270.1	ATCG00680.1	K13	K227	0	0	0	1
18	ATCG00270.1	ATCG00680.1	K7	K227	1	1	1	0
18	ATCG00270.1	ATCG00680.1	K7	K504	1	0	2	1
18	ATCG00270.1	ATCG00680.1	T9	K227	0	1	1	2
18	ATCG00270.1	ATCG00680.1	T9	K504	0	1	0	1
18	ATCG00280.1	AT3G50820.1	Y340	K244	1	1	1	1
18	ATCG00560.1	ATCG00680.1	T2	K130	0	1	1	1
18	ATCG00560.1	ATCG00680.1	T2	T128	1	0	0	0
18	ATCG00560.1	ATCG00710.1	T2	A2	1	1	0	1
18	ATCG00680.1	AT1G29930.1	T503	K37	0	0	0	1
18	ATCG00680.1	ATCG00270.1	K130	K7	0	1	1	2
18	ATCG00680.1	ATCG00270.1	K130	T9	0	0	1	0
18	ATCG00680.1	ATCG00270.1	K504	K10	0	1	1	0
18	ATCG00680.1	ATCG00270.1	T128	K7	1	0	0	0
18	ATCG00680.1	ATCG00710.1	K130	A2	0	1	0	0
18	ATCG00680.1	ATCG00710.1	T128	A2	0	0	0	1
18	ATCG00710.1	AT1G29930.1	A2	K41	0	1	0	0
18	ATCG00710.1	ATCG00270.1	A2	T9	0	0	1	0
18	ATCG00710.1	ATCG00680.1	A2	K227	0	1	1	0
18	ATCG00710.1	ATCG00680.1	A2	T128	1	0	1	0
17	AT2G05070.1	AT1G29930.1	T40	K37	0	0	0	1
17	AT5G01530.1	ATCG00710.1	K120	S16	1	0	0	0
17	AT5G01530.1	ATCG00710.1	T114	K21	1	1	0	0
17	ATCG00130.E	ATCG00120.1	K94	K506	0	0	1	0
17	ATCG00140.1	AT5G17670.1	K48	A2	0	1	1	1
17	ATCG00140.1	ATCG00470.1	K48	K109	0	0	1	0
17	ATCG00270.1	AT1G29930.1	K7	K41	0	0	0	1
17	ATCG00270.1	AT1G29930.1	T9	K37	0	1	0	1
17	ATCG00270.1	AT1G29930.1	T9	K41	0	1	0	0
17	ATCG00270.1	AT1G74970.1	K7	Y109	0	0	0	1
17	ATCG00270.1	AT5G02160.1	T9	K95	0	1	0	0
17	ATCG00270.1	ATCG00680.1	K10	K227	1	0	0	0
17	ATCG00270.1	ATCG00680.1	K7	K227	1	1	1	1
17	ATCG00270.1	ATCG00680.1	K7	K504	0	1	1	1
17	ATCG00270.1	ATCG00680.1	T9	K227	1	1	1	1
17	ATCG00270.1	ATCG00680.1	T9	K504	1	0	1	0
17	ATCG00280.1	AT3G50820.1	K339	K244	0	1	0	0
17	ATCG00280.1	AT3G50820.1	T335	K244	1	0	0	0
17	ATCG00280.1	AT3G50820.1	Y340	K244	0	0	1	1
17	ATCG00560.1	ATCG00680.1	T2	K130	1	0	1	1
17	ATCG00560.1	ATCG00680.1	T2	T128	0	1	0	0
17	ATCG00560.1	ATCG00710.1	S4	A2	0	0	0	1
17	ATCG00560.1	ATCG00710.1	T2	A2	0	1	0	0
17	ATCG00680.1	AT1G29930.1	T503	K37	0	0	1	1
17	ATCG00680.1	ATCG00270.1	K130	K7	0	0	0	1
17	ATCG00680.1	ATCG00270.1	K130	T9	0	1	1	1
17	ATCG00680.1	ATCG00270.1	K504	K10	0	1	1	0
17	ATCG00680.1	ATCG00270.1	T128	K7	1	0	1	0
17	ATCG00680.1	ATCG00580.E	K504	S2	0	0	1	0
17	ATCG00680.1	ATCG00710.1	K130	A2	0	1	1	1
17	ATCG00680.1	ATCG00710.1	T128	A2	1	0	0	0
17	ATMG01190.E	ATCG00120.1	K384	K382	0	0	0	1
16	AT1G43170.9	ATCG00120.1	K172	K506	0	0	1	0
16	AT2G05070.1	AT1G29930.1	T40	K37	0	0	1	0
16	AT3G25520.1	AT3G46780.1	K277	S478	0	1	0	0
16	AT5G01530.1	ATCG00710.1	T114	A2	0	1	0	0
16	AT5G01530.1	ATCG00710.1	T114	K21	0	1	0	0
16	ATCG00130.E	ATCG00120.1	K94	K506	0	1	0	0
16	ATCG00140.1	AT5G17670.1	K48	A2	0	0	0	1
16	ATCG00140.1	ATCG00470.1	K48	K109	0	1	0	0
16	ATCG00270.1	AT1G29930.1	K7	K41	0	1	0	1
16	ATCG00270.1	AT1G29930.1	T9	K37	0	0	0	1
16	ATCG00270.1	AT1G29930.1	T9	K41	0	0	1	0
16	ATCG00270.1	AT5G02160.1	T9	K95	0	0	1	0
16	ATCG00270.1	ATCG00170.1	K7	K1202	0	0	0	1
16	ATCG00270.1	ATCG00580.E	T9	S2	0	0	0	1
16	ATCG00270.1	ATCG00680.1	K10	K227	1	0	1	1
16	ATCG00270.1	ATCG00680.1	K7	K227	1	1	1	1
16	ATCG00270.1	ATCG00680.1	K7	K504	0	1	1	0
16	ATCG00270.1	ATCG00680.1	K7	T503	0	0	0	1
16	ATCG00270.1	ATCG00680.1	T9	K227	1	1	0	0
16	ATCG00270.1	ATCG00680.1	T9	K504	1	0	0	0
16	ATCG00280.1	AT3G50820.1	Y340	K244	1	1	1	1
16	ATCG00560.1	ATCG00680.1	T2	K130	0	1	0	1
16	ATCG00560.1	ATCG00680.1	T2	T128	1	0	1	0
16	ATCG00560.1	ATCG00710.1	T2	A2	0	1	1	0
16	ATCG00680.1	AT4G37820.1	K304	K355	0	1	0	0
16	ATCG00680.1	ATCG00270.1	K130	K7	0	1	1	0
16	ATCG00680.1	ATCG00270.1	K130	T9	1	0	0	2
16	ATCG00680.1	ATCG00270.1	K504	K10	0	1	0	1
16	ATCG00680.1	ATCG00270.1	T128	K7	0	0	1	0
16	ATCG00680.1	ATCG00270.1	T503	K10	0	0	1	0
16	ATCG00680.1	ATCG00580.E	K504	S2	1	0	0	0
16	ATCG00680.1	ATCG00710.1	K130	A2	0	1	1	1
16	ATCG00710.1	ATCG00270.1	A2	T9	0	1	0	0
16	ATCG00710.1	ATCG00270.1	S10	K7	0	1	0	0
16	ATCG00710.1	ATCG00680.1	A2	K227	0	0	1	0
16	ATCG00710.1	ATCG00680.1	A2	T503	0	1	0	0
15	AT1G29930.1	ATCG00270.1	K41	K10	0	1	0	0
15	AT1G31330.1	ATCG00350.1	K219	K707	1	0	0	0
15	AT2G05070.1	AT1G29930.1	T40	K37	0	0	0	1
15	AT3G08940.2	ATCG00710.1	K117	T18	1	0	0	0
15	AT3G08940.2	ATCG00710.1	T111	K21	0	1	0	0
15	AT5G01530.1	ATCG00710.1	T114	K21	1	0	1	0
15	ATCG00130.E	ATCG00120.1	K94	K506	1	1	0	0
15	ATCG00140.1	AT5G17670.1	K48	A2	0	0	1	1
15	ATCG00140.1	ATCG00470.1	K48	K109	0	0	1	0
15	ATCG00270.1	AT1G29930.1	K7	K37	0	1	0	1
15	ATCG00270.1	AT1G29930.1	K7	K41	0	0	0	2
15	ATCG00270.1	AT3G08940.2	T9	K38	0	1	0	0
15	ATCG00270.1	ATCG00170.1	T9	K1202	0	0	0	1
15	ATCG00270.1	ATCG00680.1	K10	K227	1	0	0	0
15	ATCG00270.1	ATCG00680.1	K7	K227	2	2	2	1
15	ATCG00270.1	ATCG00680.1	K7	K504	0	0	1	2
15	ATCG00270.1	ATCG00680.1	T9	K504	1	1	1	0
15	ATCG00280.1	AT3G50820.1	K339	K244	1	1	0	1
15	ATCG00280.1	AT3G50820.1	Y340	K244	0	0	1	0
15	ATCG00350.1	AT1G30380.1	K327	K79	0	0	1	0
15	ATCG00560.1	ATCG00680.1	T2	K130	1	1	1	1
15	ATCG00560.1	ATCG00710.1	T2	A2	1	1	0	1
15	ATCG00560.1	ATCG00710.1	T2	T5	0	0	1	0
15	ATCG00680.1	AT1G29930.1	T503	K37	0	0	0	1
15	ATCG00680.1	ATCG00270.1	K130	K7	0	1	2	1
15	ATCG00680.1	ATCG00270.1	K130	T9	1	0	0	1
15	ATCG00680.1	ATCG00270.1	K227	K10	0	0	1	0
15	ATCG00680.1	ATCG00270.1	K504	K10	0	0	0	1
15	ATCG00680.1	ATCG00270.1	T503	K10	1	0	1	0
15	ATCG00680.1	ATCG00710.1	K130	A2	1	1	1	1
15	ATCG00710.1	ATCG00270.1	A2	T9	1	2	0	0
15	ATCG00710.1	ATCG00680.1	A2	K227	0	1	1	1
14	AT1G03600.1	AT1G12250.2	S87	K162	0	1	0	0
14	AT2G05070.1	AT1G29930.1	K42	K37	0	0	0	1
14	AT3G08940.2	ATCG00710.1	T111	K21	1	0	0	0
14	AT4G09650.1	ATCG00480.1	Y202	K86	0	1	0	0
14	ATCG00140.1	AT5G17670.1	K48	A2	0	1	0	0
14	ATCG00270.1	AT1G29930.1	K7	K41	0	1	0	1
14	ATCG00270.1	AT1G29930.1	T9	K37	0	2	0	1
14	ATCG00270.1	AT1G29930.1	T9	K41	1	0	0	0
14	ATCG00270.1	AT5G02160.1	K7	K95	0	1	1	0
14	ATCG00270.1	AT5G02160.1	T9	K95	0	0	0	1
14	ATCG00270.1	ATCG00170.1	T9	K1202	0	0	1	1
14	ATCG00270.1	ATCG00580.E	K7	S2	0	0	0	1
14	ATCG00270.1	ATCG00680.1	K7	K227	0	2	0	2
14	ATCG00270.1	ATCG00680.1	K7	K504	1	1	0	1
14	ATCG00270.1	ATCG00680.1	T9	K227	1	0	2	0
14	ATCG00270.1	ATCG00680.1	T9	K504	0	0	1	0
14	ATCG00280.1	AT3G50820.1	K339	K244	1	0	0	0
14	ATCG00280.1	AT3G50820.1	Y340	K244	0	1	1	1
14	ATCG00350.1	AT1G30380.1	K327	K79	0	0	1	1
14	ATCG00560.1	ATCG00680.1	T2	K130	1	0	1	1
14	ATCG00560.1	ATCG00680.1	T2	T128	0	1	0	0
14	ATCG00560.1	ATCG00710.1	T2	A2	1	1	1	0
14	ATCG00680.1	AT1G29930.1	K504	K37	0	0	0	1
14	ATCG00680.1	ATCG00270.1	K130	K7	0	1	0	0
14	ATCG00680.1	ATCG00270.1	K130	T9	1	0	0	2
14	ATCG00680.1	ATCG00270.1	K504	K10	0	1	0	1
14	ATCG00680.1	ATCG00270.1	T128	K7	0	0	1	0
14	ATCG00680.1	ATCG00270.1	T503	K10	1	0	0	0
14	ATCG00680.1	ATCG00580.E	K504	S2	1	0	0	0
14	ATCG00680.1	ATCG00710.1	K130	A2	0	1	0	1
14	ATCG00680.1	ATCG00710.1	T128	A2	1	0	1	0
14	ATCG00710.1	AT1G29930.1	A2	K41	0	1	0	0
14	ATCG00710.1	AT4G11010.1	A2	T195	0	1	0	0
14	ATCG00710.1	ATCG00680.1	A2	K227	0	1	0	0
13	AT5G01530.1	ATCG00710.1	K120	S16	0	1	0	1
13	AT5G01530.1	ATCG00710.1	T114	K21	0	0	1	1
13	ATCG00140.1	AT5G17670.1	K48	A2	1	0	1	0
13	ATCG00270.1	AT1G29930.1	K7	K41	0	1	0	0
13	ATCG00270.1	AT5G02160.1	K7	K95	0	0	1	1
13	ATCG00270.1	AT5G02160.1	T9	K95	0	1	0	0
13	ATCG00270.1	ATCG00580.E	K7	S4	0	0	0	1
13	ATCG00270.1	ATCG00580.E	T9	S2	1	0	0	1
13	ATCG00270.1	ATCG00680.1	K7	K227	1	1	2	2
13	ATCG00270.1	ATCG00680.1	K7	K504	1	0	1	1
13	ATCG00270.1	ATCG00680.1	T9	K227	1	0	0	0
13	ATCG00270.1	ATCG00680.1	T9	K504	0	1	0	0
13	ATCG00280.1	AT3G50820.1	S330	K244	0	1	0	0
13	ATCG00280.1	AT3G50820.1	Y340	K244	1	0	1	1
13	ATCG00350.1	AT1G30380.1	K327	K79	1	0	0	0
13	ATCG00560.1	ATCG00680.1	T2	K130	1	0	0	1
13	ATCG00560.1	ATCG00680.1	T2	T128	0	1	0	0
13	ATCG00560.1	ATCG00710.1	T2	A2	1	1	1	1
13	ATCG00680.1	ATCG00270.1	K130	T9	0	0	0	1
13	ATCG00680.1	ATCG00270.1	K504	K10	1	1	1	1
13	ATCG00680.1	ATCG00270.1	T128	K7	0	1	0	0
13	ATCG00680.1	ATCG00580.E	K504	S2	1	1	1	0
13	ATCG00680.1	ATCG00580.E	K504	T5	1	0	0	0
13	ATCG00680.1	ATCG00710.1	K130	A2	0	0	0	1
13	ATCG00680.1	ATCG00710.1	T128	A2	1	0	0	0
13	ATCG00710.1	AT1G29930.1	A2	K41	0	1	0	0
13	ATCG00710.1	ATCG00270.1	S10	K7	0	0	0	1
13	ATCG00710.1	ATCG00270.1	T5	K7	0	0	0	1
13	ATCG00710.1	ATCG00680.1	A2	K227	0	1	0	0
13	ATCG00710.1	ATCG00680.1	A2	T128	0	1	0	0
12	AT1G03600.1	AT1G36240.1	T171	K23	0	1	0	0
12	AT3G08940.2	ATCG00710.1	K117	S16	0	0	0	1
12	AT5G01530.1	ATCG00710.1	T114	A2	0	1	0	0
12	AT5G01530.1	ATCG00710.1	T114	K21	1	1	0	0
12	ATCG00140.1	AT5G17670.1	K48	A2	1	0	0	0
12	ATCG00140.1	ATCG00470.1	K48	K109	0	1	0	0
12	ATCG00270.1	AT1G29930.1	K7	K41	0	0	0	1
12	ATCG00270.1	AT1G29930.1	T9	K41	0	0	1	0
12	ATCG00270.1	AT3G08940.2	T9	K38	0	0	0	1
12	ATCG00270.1	AT5G02160.1	K7	K95	0	1	0	2
12	ATCG00270.1	AT5G02160.1	T9	K95	0	0	1	0
12	ATCG00270.1	ATCG00580.E	K7	S2	1	0	0	0
12	ATCG00270.1	ATCG00580.E	K7	T5	1	0	0	1
12	ATCG00270.1	ATCG00580.E	T9	S2	0	0	1	1
12	ATCG00270.1	ATCG00680.1	K10	K227	0	1	0	0
12	ATCG00270.1	ATCG00680.1	K7	K227	1	0	0	1
12	ATCG00270.1	ATCG00680.1	T9	K227	1	1	1	1
12	ATCG00270.1	ATCG00680.1	T9	K504	0	1	0	1
12	ATCG00280.1	AT3G50820.1	K339	K244	0	1	0	0
12	ATCG00280.1	AT3G50820.1	Y340	K244	1	0	0	1
12	ATCG00560.1	ATCG00680.1	T2	K130	0	0	0	1
12	ATCG00560.1	ATCG00680.1	T2	T128	1	1	0	0
12	ATCG00560.1	ATCG00710.1	T2	A2	0	1	0	1
12	ATCG00580.E	ATCG00270.1	S2	K10	0	1	0	0
12	ATCG00680.1	ATCG00270.1	K130	K7	0	1	0	0
12	ATCG00680.1	ATCG00580.E	K504	S2	0	1	0	0
12	ATCG00680.1	ATCG00580.E	T503	S2	1	0	0	0
12	ATCG00680.1	ATCG00710.1	K130	A2	0	1	0	1
12	ATCG00710.1	AT1G29930.1	A2	K41	0	1	0	0
12	ATCG00710.1	ATCG00680.1	A2	K227	0	1	0	0
12	ATMG01190.E	ATCG00120.1	K384	K382	0	0	0	1
11	AT1G29930.1	ATCG00270.1	K43	T9	0	0	0	1
11	AT2G05070.1	AT1G29930.1	K42	K37	0	0	0	2
11	AT2G05070.1	AT1G29930.1	T40	K37	0	0	1	0
11	AT5G01530.1	ATCG00710.1	T114	K21	0	0	1	0
11	ATCG00140.1	AT5G17670.1	K48	A2	0	1	0	0
11	ATCG00270.1	AT1G29930.1	K7	K41	0	1	1	3
11	ATCG00270.1	AT1G29930.1	T9	K37	0	0	1	1
11	ATCG00270.1	AT3G08940.2	T9	K38	0	1	0	1
11	ATCG00270.1	AT5G02160.1	K7	K95	0	0	0	1
11	ATCG00270.1	AT5G02160.1	T9	K95	0	0	1	0
11	ATCG00270.1	ATCG00580.E	K7	S2	0	0	1	1
11	ATCG00270.1	ATCG00580.E	T9	S2	2	0	0	0
11	ATCG00270.1	ATCG00680.1	T9	K504	1	0	0	0
11	ATCG00280.1	AT3G50820.1	K339	K244	0	0	1	0
11	ATCG00280.1	AT3G50820.1	T335	K244	1	0	0	0
11	ATCG00280.1	AT3G50820.1	Y340	K244	0	1	0	1
11	ATCG00560.1	ATCG00680.1	T2	K130	0	0	0	1
11	ATCG00560.1	ATCG00680.1	T2	T128	1	1	1	0
11	ATCG00560.1	ATCG00710.1	T2	A2	0	1	0	1
11	ATCG00680.1	ATCG00580.E	K504	S2	1	0	0	0
11	ATCG00680.1	ATCG00710.1	K130	A2	1	0	0	1
11	ATCG00710.1	ATCG00270.1	T5	K7	0	0	0	1
11	ATCG00710.1	ATCG00680.1	A2	K227	0	0	0	1
11	ATCG01060.1	AT1G03130.1	S2	K199	0	0	0	1
11	ATMG01190.E	ATCG00120.1	K384	K382	0	0	0	1
10	AT1G03130.1	AT2G20260.1	S184	K95	0	1	0	0
10	AT1G06680.1	AT2G27530.2	K243	K24	0	1	0	0
10	AT1G79040.1	ATCG00580.E	K51	S2	0	0	0	1
10	AT2G05070.1	AT1G29930.1	T40	K37	0	0	0	1
10	AT2G05070.1	ATCG00270.1	T40	K7	0	1	0	0
10	AT4G04640.1	ATCG00470.1	K125	K109	0	1	0	0
10	AT5G01530.1	ATCG00710.1	K120	S16	1	0	0	0
10	AT5G01530.1	ATCG00710.1	T114	K21	0	1	1	1
10	ATCG00120.1	AT3G15090.1	K456	S6	1	0	0	0
10	ATCG00140.1	AT5G17670.1	K48	A2	1	0	0	0
10	ATCG00270.1	AT1G29930.1	K7	K37	0	1	0	1
10	ATCG00270.1	AT1G29930.1	K7	K41	1	1	1	1
10	ATCG00270.1	AT1G29930.1	T9	K37	0	1	1	0
10	ATCG00270.1	AT1G29930.1	T9	K41	0	1	0	0
10	ATCG00270.1	AT5G02160.1	T9	K95	0	1	0	0
10	ATCG00270.1	ATCG00580.E	K7	T5	1	0	0	0
10	ATCG00270.1	ATCG00580.E	T9	S2	1	0	0	0
10	ATCG00270.1	ATCG00680.1	T9	K227	1	0	0	0
10	ATCG00280.1	AT3G50820.1	K339	K244	1	0	0	1
10	ATCG00280.1	AT3G50820.1	Y340	K244	0	1	0	0
10	ATCG00560.1	ATCG00680.1	T2	K130	0	0	0	1
10	ATCG00560.1	ATCG00680.1	T2	T128	1	1	0	0
10	ATCG00560.1	ATCG00710.1	T2	A2	1	1	1	1
10	ATCG00680.1	AT1G18170.1	T128	K170	0	0	0	1
10	ATCG00680.1	ATCG00710.1	K130	A2	0	0	0	1
10	ATCG00680.1	ATCG00710.1	T128	A2	0	1	0	0
10	ATCG00710.1	AT1G29930.1	A2	K37	0	1	0	0
10	ATCG00710.1	ATCG00270.1	S10	K7	1	0	0	0
10	ATCG00710.1	ATCG00680.1	A2	K227	0	1	0	0
10	ATCG00710.1	ATCG00680.1	A2	T128	1	0	1	0
10	ATCG01060.1	AT1G03130.1	S2	T197	0	2	0	1
10	ATMG01190.E	AT3G46780.1	K384	K487	0	0	0	1
9	AT1G03130.1	AT2G20260.1	S184	K95	0	1	0	0
9	AT1G79040.1	ATCG00580.E	K51	S2	0	0	0	1
9	AT2G05070.1	AT1G29930.1	K42	K41	0	0	0	1
9	AT2G05070.1	AT1G29930.1	K42	T38	0	0	0	1
9	AT2G20260.1	AT1G31330.1	S132	K219	1	0	0	0
9	AT5G01530.1	ATCG00710.1	T114	K21	1	0	0	0
9	ATCG00140.1	AT5G17670.1	K48	A2	0	0	0	1
9	ATCG00270.1	AT1G29930.1	K7	K41	0	1	0	1
9	ATCG00270.1	AT1G29930.1	T9	K37	0	0	0	1
9	ATCG00270.1	AT1G29930.1	T9	K41	1	0	0	0
9	ATCG00270.1	AT5G02160.1	K7	K95	0	1	0	0
9	ATCG00280.1	AT3G50820.1	Y340	K244	1	0	0	0
9	ATCG00560.1	ATCG00680.1	T2	K130	0	0	0	1
9	ATCG00560.1	ATCG00680.1	T2	T128	1	1	1	0
9	ATCG00560.1	ATCG00710.1	T2	A2	0	1	0	0
9	ATCG00680.1	ATCG00580.E	T503	S2	1	0	0	0
9	ATCG00680.1	ATCG00710.1	K130	A2	0	1	0	0
9	ATCG00710.1	AT1G29930.1	A2	K41	0	1	0	0
9	ATCG00710.1	ATCG00270.1	A2	T9	1	0	0	0
9	ATCG00710.1	ATCG00680.1	A2	K130	0	0	0	1
9	ATCG00710.1	ATCG00680.1	A2	K227	0	1	0	0
9	ATCG01060.1	AT1G03130.1	S2	K199	0	1	0	0
9	ATCG01060.1	AT4G02770.1	S2	T201	1	0	1	0
8	AT1G03130.1	AT2G20260.1	S184	K95	0	1	0	0
8	AT2G05070.1	AT1G29930.1	K42	K41	0	0	1	0
8	AT2G05070.1	AT1G29930.1	T40	K37	0	0	1	1
8	ATCG00140.1	AT5G17670.1	K48	A2	1	1	0	0
8	ATCG00270.1	AT1G29930.1	K7	K41	1	0	0	0
8	ATCG00270.1	AT5G02160.1	K7	K95	0	0	1	0
8	ATCG00270.1	AT5G02160.1	T9	K95	0	0	0	1
8	ATCG00270.1	ATCG00580.E	K7	T5	0	0	0	1
8	ATCG00560.1	ATCG00680.1	T2	T128	1	1	1	0
8	ATCG00560.1	ATCG00710.1	T2	A2	0	1	0	0
8	ATCG00680.1	ATCG00580.E	K504	S2	0	0	1	0
8	ATCG00680.1	ATCG00710.1	K130	A2	1	0	0	0
8	ATCG00680.1	ATCG00710.1	T128	A2	0	1	0	0
8	ATCG00710.1	ATCG00270.1	T5	K7	0	0	1	0
8	ATCG00710.1	ATCG00680.1	A2	K227	0	1	0	0
8	ATCG01060.1	AT1G03130.1	S2	K199	0	1	0	0
8	ATCG01060.1	AT4G02770.1	S2	K203	1	0	0	0
8	ATCG01060.1	AT4G02770.1	S2	T201	1	0	0	0
7	AT1G29930.1	ATCG00580.E	K37	T5	0	0	1	0
7	ATCG00140.1	AT5G17670.1	K48	A2	0	1	1	0
7	ATCG00270.1	AT5G02160.1	K7	K95	0	2	2	0
7	ATCG00270.1	ATCG00580.E	K7	T5	0	0	0	1
7	ATCG00560.1	AT1G29930.1	T2	K37	0	0	0	1
7	ATCG00560.1	ATCG00710.1	T2	A2	0	1	1	1
7	ATCG00580.E	ATCG00270.1	S2	K10	0	1	0	0
7	ATCG00680.1	ATCG00580.E	K504	S2	1	0	1	0
7	ATCG00710.1	AT1G29930.1	A2	K37	0	1	0	0
7	ATCG00710.1	AT1G29930.1	A2	K41	0	2	0	0
7	ATCG00710.1	AT1G29930.1	K21	K37	0	1	0	0
7	ATCG00710.1	AT1G29930.1	K21	T38	0	0	0	1
7	ATCG00710.1	ATCG00270.1	A2	K10	0	1	0	0
7	ATCG00710.1	ATCG00270.1	A2	K7	0	0	1	0
7	ATCG00710.1	ATCG00270.1	S10	K7	0	0	0	1
6	AT1G29930.1	ATCG00580.E	K37	S2	0	1	0	0
6	AT5G01530.1	ATCG00710.1	T114	K21	0	0	1	1
6	AT5G02160.1	ATCG00580.E	K95	T5	1	0	0	0
6	ATCG00140.1	AT5G17670.1	K48	A2	0	1	0	0
6	ATCG00140.1	ATCG00470.1	K48	K109	0	0	0	1
6	ATCG00270.1	AT5G02160.1	K7	K95	1	2	1	0
6	ATCG00560.1	AT1G29930.1	T2	K37	0	1	0	0
6	ATCG00560.1	ATCG00270.1	T2	K7	0	1	0	1
6	ATCG00560.1	ATCG00680.1	T2	K130	1	0	0	0
6	ATCG00560.1	ATCG00710.1	T2	A2	0	1	0	1
6	ATCG00580.E	ATCG00270.1	S2	K10	0	1	0	0
6	ATCG00710.1	AT1G29930.1	A2	K37	0	2	1	0
6	ATCG00710.1	AT1G29930.1	A2	K41	0	1	0	0
6	ATCG00710.1	ATCG00270.1	A2	K10	0	1	0	0
6	ATCG00710.1	ATCG00270.1	A2	K7	0	1	0	2
6	ATCG00710.1	ATCG00270.1	S10	K7	1	1	0	0
6	ATCG00710.1	ATCG00270.1	T5	K7	0	0	1	0
6	ATCG01060.1	AT1G03130.1	S2	T197	0	0	0	1
5	AT1G03130.1	AT2G20260.1	K187	S97	0	1	0	0
5	AT1G03130.1	AT2G36145.1	K124	K178	0	0	0	1
5	AT2G34430.1	AT1G29930.1	K211	K37	0	0	0	1
5	AT5G01530.1	ATCG00710.1	K120	K21	0	0	0	1
5	AT5G01530.1	ATCG00710.1	T114	K21	1	0	0	1
5	AT5G02160.1	ATCG00580.E	K95	S2	1	0	0	0
5	ATCG00140.1	AT5G17670.1	K48	A2	0	1	0	0
5	ATCG00270.1	AT5G02160.1	K7	K95	1	0	0	0
5	ATCG00270.1	AT5G02160.1	T9	K95	1	1	0	0
5	ATCG00270.1	ATCG00580.E	T9	S2	0	1	0	1
5	ATCG00560.1	ATCG00270.1	T2	K7	0	1	0	0
5	ATCG00560.1	ATCG00710.1	S4	A2	0	1	0	0
5	ATCG00560.1	ATCG00710.1	T2	A2	1	0	0	1
5	ATCG00580.E	ATCG00270.1	S2	K10	1	0	0	0
5	ATCG00680.1	ATCG00580.E	K504	S2	1	0	0	0
5	ATCG00710.1	AT1G29930.1	A2	K41	0	1	0	0
5	ATCG00710.1	AT1G29930.1	S10	K37	0	1	0	0
5	ATCG00710.1	ATCG00270.1	A2	K10	0	1	0	0
5	ATCG00710.1	ATCG00270.1	A2	K7	0	0	0	1
5	ATCG00710.1	ATCG00270.1	A2	T9	1	0	0	0
5	ATCG00710.1	ATCG00270.1	S10	K7	1	0	0	0
4	AT1G06680.1	AT2G27530.2	K243	K24	0	1	0	0
4	AT5G01530.1	ATCG00710.1	K120	S16	0	0	1	0
4	AT5G01530.1	ATCG00710.1	T114	A2	0	1	0	0
4	AT5G01530.1	ATCG00710.1	T114	K21	1	1	0	0
4	ATCG00140.1	ATCG00470.1	K48	K109	0	0	1	0
4	ATCG00270.1	AT5G02160.1	K7	K95	1	0	0	0
4	ATCG00270.1	AT5G02160.1	T9	K95	1	0	0	0
4	ATCG00560.1	ATCG00270.1	T2	K7	1	0	0	0
4	ATCG00560.1	ATCG00710.1	T2	A2	1	1	0	1
4	ATCG00580.E	ATCG00270.1	S2	K10	1	0	0	0
4	ATCG00710.1	AT1G29930.1	A2	K37	0	2	0	0
4	ATCG00710.1	AT1G29930.1	A2	K41	1	0	0	1
4	ATCG00710.1	AT1G29930.1	T5	K41	1	0	0	0
4	ATCG00710.1	ATCG00270.1	A2	T9	1	0	0	0
4	ATCG00710.1	ATCG00270.1	T5	K7	1	0	0	0
4	ATCG01060.1	AT4G02770.1	S4	K203	1	0	0	0
3	AT1G03130.1	ATCG01060.1	K170	K37	0	0	0	2
3	AT1G20020.1	AT5G66190.1	K208	K64	0	0	0	1
3	AT4G10340.1	AT5G57490.1	K43	S95	1	0	0	0
3	ATCG00140.1	AT5G17670.1	K48	A2	0	0	1	0
3	ATCG00140.1	ATCG00470.1	K48	K109	0	1	0	1
3	ATCG00270.1	ATCG00580.E	K7	T5	1	0	0	0
3	ATCG00560.1	ATCG00270.1	T2	K7	1	0	0	0
3	ATCG00560.1	ATCG00710.1	S4	A2	1	0	0	0
3	ATCG00580.E	ATCG00270.1	S2	K10	1	0	0	0
3	ATCG00710.1	ATCG00270.1	A2	T9	1	0	0	0
3	ATCG00710.1	ATCG00270.1	T5	K7	1	0	0	0
3	ATCG01060.1	AT1G03130.1	S2	T197	0	1	0	1
2	AT1G20020.1	AT5G66190.1	K208	K64	0	0	0	1
2	AT1G20020.1	AT5G66190.1	K208	S66	0	1	0	0
2	AT1G79040.1	ATCG00580.E	K51	S2	0	1	0	0
2	AT3G08940.2	ATCG00710.1	T111	K21	1	0	0	0
2	AT3G50820.1	ATCG01100.1	K99	S91	0	0	1	0
2	AT5G01530.1	ATCG00710.1	T114	K21	2	0	0	0
2	ATCG00140.1	AT5G17670.1	K48	A2	1	0	0	0
2	ATCG00140.1	ATCG00470.1	K48	K109	0	1	0	0
2	ATCG00560.1	ATCG00710.1	T2	A2	1	1	0	0
2	ATCG00680.1	ATCG00580.E	K504	S2	0	0	1	0
2	ATCG00710.1	AT1G29930.1	A2	K37	1	0	0	0
1	AT1G31330.1	AT5G22340.1	K97	K158	0	0	0	1
1	AT1G79040.1	AT4G04020.1	T49	K211	0	0	0	1
1	AT1G79040.1	ATCG00580.E	K48	S2	0	0	0	1
1	ATCG00140.1	AT5G17670.1	K48	A2	1	1	1	0
1	ATCG00140.1	ATCG00470.1	K48	K109	0	0	1	0
1	ATCG00560.1	ATCG00710.1	T2	A2	0	1	0	1
1	ATCG00710.1	AT1G29930.1	A2	K41	1	0	0	0
1	ATCG00710.1	ATCG00580.E	A2	S2	0	1	0	0
					627	655	554	523
